# Supplementary material for: The relative stabilities of 11-vertex nido- and 12-vertex closo-heteroboranes and -borates: facile estimation by structural or connection increments
Source: Royal Society of Chemistry journal article supplement (doi:10.1039/b512700a), 2005-11-22

Appendix I: HetC<sub>6</sub> energy penalties for 12-vertex *closo*-clusters generally decrease down the group and increase along the period.

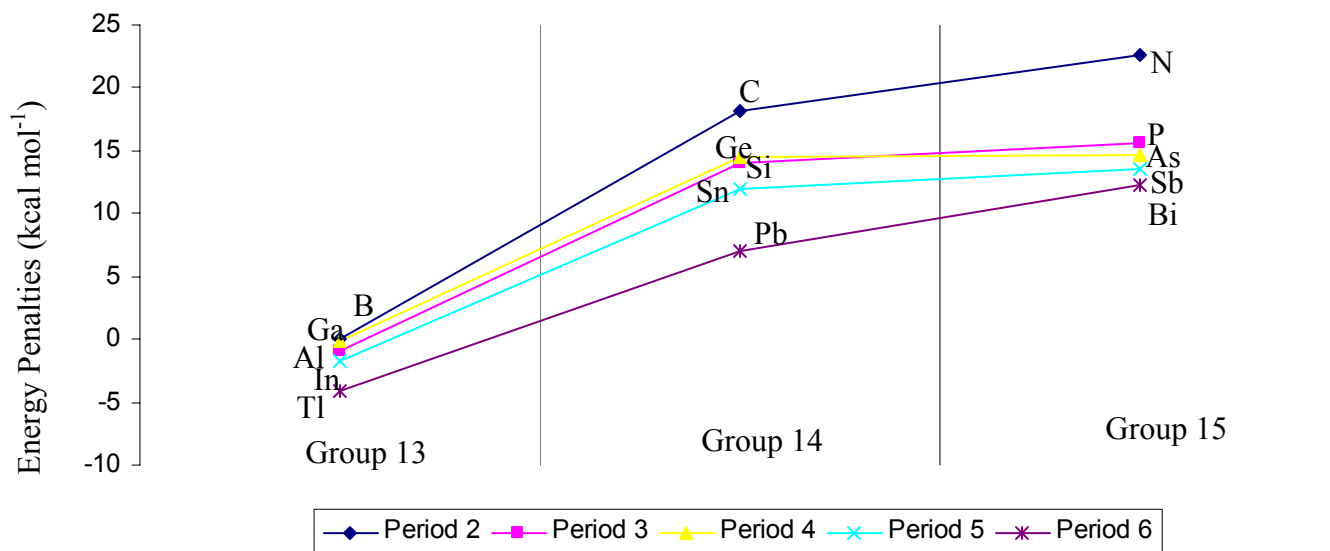

Appendix II: The relative stability of 11-vertex *nido*- and 12-vertex *closo*-stannaborane isomers based on a common set of increments.

|              | Name                                                             | Sn–B | Sn–Sn | Sn <sub>m</sub> | $\sum E_{\text{inc}}$ | $E_{\text{inc}}^{\text{rel}}$ | $E_{\text{calc}}$ | $\Delta E^{\text{b}}$ |
|--------------|------------------------------------------------------------------|------|-------|-----------------|-----------------------|-------------------------------|-------------------|-----------------------|
|              |                                                                  | 64   | 121   | –4              |                       |                               |                   |                       |
|              | 7-SnB <sub>10</sub> H <sub>11</sub> <sup>3–</sup>                | 4    |       |                 | 256                   | 0                             | 0 <sup>a</sup>    | 0                     |
|              | 2-SnB <sub>10</sub> H <sub>11</sub> <sup>3–</sup>                | 5    |       |                 | 320                   | 64                            | 64                | 0                     |
|              | 7,9-Sn <sub>2</sub> B <sub>9</sub> H <sub>11</sub> <sup>2–</sup> | 8    |       | 1               | 508                   | 0                             | 0 <sup>a</sup>    | 0                     |
| <i>nido</i>  | 7,8-Sn <sub>2</sub> B <sub>9</sub> H <sub>11</sub> <sup>2–</sup> | 6    | 1     |                 | 505                   | –3                            | 3 <sup>a</sup>    | –6                    |
|              | 1,12-Sn <sub>2</sub> B <sub>10</sub> H <sub>12</sub>             | 10   |       |                 | 640                   | 0                             | 0                 | 0                     |
|              | 1,7-Sn <sub>2</sub> B <sub>10</sub> H <sub>12</sub>              | 10   |       | 1               | 636                   | –4                            | –6                | 2                     |
| <i>closo</i> | 1,2-Sn <sub>2</sub> B <sub>10</sub> H <sub>12</sub>              | 8    | 1     |                 | 633                   | –7                            | –13               | 6                     |

<sup>a</sup> Computed relative energies for 11-vertex *nido*-stannaboranes and -borates are taken from ref. 10. <sup>b</sup>  $\Delta E$  is the energy difference of  $E_{\text{inc}}^{\text{rel}}$  and  $E_{\text{calc}}$ . <sup>c</sup> 2,7-, 2,8- and 2,9-isomers don't show additive nature due to significant cluster distortion.

Appendix III: The relative stability of 11-vertex *nido*- and 12-vertex *closo*-phosphaborane isomers based on a common set of increments.

| Name                                                                       | P-B | P-P | PP <sub>m</sub> | $\sum E_{\text{inc}}$ | $E_{\text{inc}}^{\text{rel}}$ | $E_{\text{calc}}^{\text{a}}$ | $\Delta E^{\text{b}}$ |
|----------------------------------------------------------------------------|-----|-----|-----------------|-----------------------|-------------------------------|------------------------------|-----------------------|
|                                                                            | 27  | 65  | 2               |                       |                               |                              |                       |
| 7-PB <sub>10</sub> H <sub>10</sub> <sup>3-</sup>                           | 4   |     |                 | 108                   | 0                             | 0                            | 0                     |
| 2-PB <sub>10</sub> H <sub>10</sub> <sup>3-</sup>                           | 5   |     |                 | 135                   | 27                            | 28                           | -1                    |
| 7,9-P <sub>2</sub> B <sub>9</sub> H <sub>9</sub> <sup>2-</sup>             | 8   |     | 1               | 218                   | 0                             | 0                            | 0                     |
| 7,8-P <sub>2</sub> B <sub>9</sub> H <sub>9</sub> <sup>2-</sup>             | 6   | 1   |                 | 227                   | 9                             | 12                           | -3                    |
| <i>nido</i> 2,9-P <sub>2</sub> B <sub>9</sub> H <sub>9</sub> <sup>2-</sup> | 9   |     |                 | 243                   | 25                            | 27                           | -2                    |
| 2,8-P <sub>2</sub> B <sub>9</sub> H <sub>9</sub> <sup>2-</sup>             | 9   |     | 1               | 245                   | 27                            | 29                           | -2                    |
| 2,7-P <sub>2</sub> B <sub>9</sub> H <sub>9</sub> <sup>2-</sup>             | 7   | 1   |                 | 254                   | 36                            | 38                           | -2                    |
| 7,8,10-P <sub>3</sub> B <sub>8</sub> H <sub>8</sub> <sup>-</sup>           | 10  | 1   | 2               | 339                   | 0                             | 0                            | 0                     |
| 7,8,9-P <sub>3</sub> B <sub>8</sub> H <sub>8</sub> <sup>-</sup>            | 8   | 2   | 1               | 348                   | 9                             | 11                           | -2                    |
| 1,12-P <sub>2</sub> B <sub>10</sub> H <sub>10</sub>                        | 10  |     |                 | 270                   | 0                             | 0                            | 0                     |
| <i>closo</i> 1,7-P <sub>2</sub> B <sub>10</sub> H <sub>10</sub>            | 10  |     | 1               | 272                   | 2                             | 2                            | 0                     |
| 1,2-P <sub>2</sub> B <sub>10</sub> H <sub>10</sub>                         | 8   | 1   |                 | 281                   | 11                            | 7                            | 4                     |

<sup>a</sup> Computed relative energies for 11-vertex *nido*-phosphaboranes and -borates are taken from ref. 8. <sup>b</sup>  $\Delta E$  is the energy difference of  $E_{\text{inc}}^{\text{rel}}$  and  $E_{\text{calc}}$ .

Appendix IV: The relative stability of 11-vertex *nido*- and 12-vertex *closo*-arsaborane isomers based on a common set of increments.

| Name                                                                        | As–B | As–As | AsAs <sub>m</sub> | $\sum E_{\text{inc}}$ | $E_{\text{inc}}^{\text{rel}}$ | $E_{\text{calc}}^{\text{a}}$ | $\Delta E^{\text{b}}$ |
|-----------------------------------------------------------------------------|------|-------|-------------------|-----------------------|-------------------------------|------------------------------|-----------------------|
|                                                                             | 29   | 62    | 1                 |                       |                               |                              |                       |
| <i>nido</i> 7-AsB <sub>10</sub> H <sub>10</sub> <sup>3-</sup>               | 4    |       |                   | 116                   | 0                             | 0                            | 0                     |
| <i>nido</i> 2-AsB <sub>10</sub> H <sub>10</sub> <sup>3-</sup>               | 5    |       |                   | 145                   | 29                            | 29                           | 0                     |
| <i>nido</i> 7,9-As <sub>2</sub> B <sub>9</sub> H <sub>9</sub> <sup>2-</sup> | 8    |       | 1                 | 233                   | 0                             | 0                            | 0                     |
| <i>nido</i> 7,8-As <sub>2</sub> B <sub>9</sub> H <sub>9</sub> <sup>2-</sup> | 6    | 1     |                   | 236                   | 3                             | 7                            | -4                    |
| <i>closo</i> 1,12-As <sub>2</sub> B <sub>10</sub> H <sub>10</sub>           | 10   |       |                   | 290                   | 0                             | 0                            | 0                     |
| <i>closo</i> 1,7-As <sub>2</sub> B <sub>10</sub> H <sub>10</sub>            | 10   |       | 1                 | 291                   | 1                             | 2                            | -1                    |
| <i>closo</i> 1,2-As <sub>2</sub> B <sub>10</sub> H <sub>10</sub>            | 8    | 1     |                   | 294                   | 4                             | 1                            | 3                     |

<sup>a</sup> Computed relative energies for 11-vertex *nido*-arsaboranes and -borates are taken from ref.

5. <sup>b</sup>  $\Delta E$  is the energy difference of  $E_{\text{inc}}^{\text{rel}}$  and  $E_{\text{calc}}$ .

Appendix V: The relative stability of 11-vertex *nido*- and 12-vertex *closo*-stibaborane isomers based on a common set of increments.

| Name         | Sb–B Sb–Sb SbSb <sub>m</sub>                                    |    |    | $\sum E_{\text{inc}}$ | $E_{\text{inc}}^{\text{rel}}$ | $E_{\text{calc}}^{\text{a}}$ | $\Delta E^{\text{b}}$ |
|--------------|-----------------------------------------------------------------|----|----|-----------------------|-------------------------------|------------------------------|-----------------------|
|              | 32                                                              | 62 | -3 |                       |                               |                              |                       |
| <i>nido</i>  | 7-SbB <sub>10</sub> H <sub>10</sub> <sup>3-</sup>               | 4  |    | 128                   | 0                             | 0                            | 0                     |
|              | 2-SbB <sub>10</sub> H <sub>10</sub> <sup>3-</sup>               | 5  |    | 160                   | 32                            | 29                           | 3                     |
|              | 7,9-Sb <sub>2</sub> B <sub>9</sub> H <sub>9</sub> <sup>2-</sup> | 8  |    | 253                   | 0                             | 0                            | 0                     |
|              | 7,8-Sb <sub>2</sub> B <sub>9</sub> H <sub>9</sub> <sup>2-</sup> | 6  | 1  | 254                   | 1                             | 4                            | -3                    |
| <i>closo</i> | 1,12-Sb <sub>2</sub> B <sub>10</sub> H <sub>10</sub>            | 10 |    | 320                   | 0                             | 0                            | 0                     |
|              | 1,7-Sb <sub>2</sub> B <sub>10</sub> H <sub>10</sub>             | 10 |    | 317                   | -3                            | -1                           | -2                    |
|              | 1,2-Sb <sub>2</sub> B <sub>10</sub> H <sub>10</sub>             | 8  | 1  | 318                   | -2                            | -6                           | 4                     |

<sup>a</sup> Computed relative energies for 11-vertex *nido*-phosphaboranes and -borates are taken from ref. 5. <sup>b</sup>  $\Delta E$  is the energy difference of  $E_{\text{inc}}^{\text{rel}}$  and  $E_{\text{calc}}$ .

Appendix VI: Cartesian coordinates of the optimized geometries of the 12-vertex *closo*-diheterododecaboranes.

|                                                             |           |           |           |                                                              |           |           |           |
|-------------------------------------------------------------|-----------|-----------|-----------|--------------------------------------------------------------|-----------|-----------|-----------|
| <i>1,2</i> -Al <sub>2</sub> B <sub>10</sub> H <sub>12</sub> |           |           |           | B                                                            | 0.897904  | 0.261270  | 1.510668  |
| B                                                           | -1.306941 | -0.001776 | 1.463095  | B                                                            | 1.464589  | 1.189229  | 0.000554  |
| B                                                           | -1.840162 | -0.900887 | 0.001387  | B                                                            | 0.000365  | 1.700353  | -0.901079 |
| B                                                           | -0.415654 | -1.461012 | 0.935691  | Al                                                           | 1.892354  | -0.929258 | -0.000419 |
| B                                                           | 0.492856  | 0.000726  | 1.612831  | B                                                            | 0.897933  | 0.262635  | -1.510717 |
| B                                                           | -0.420046 | 1.460091  | 0.936088  | B                                                            | -0.897911 | 0.263104  | -1.510932 |
| B                                                           | -1.843842 | 0.896166  | 0.001503  | Al                                                           | -1.892741 | -0.928753 | -0.000280 |
| Al                                                          | 1.518917  | 1.249434  | -0.001031 | B                                                            | -0.000349 | -1.267305 | 0.972144  |
| B                                                           | -0.421917 | 1.460327  | -0.936340 | B                                                            | -0.000196 | -1.266270 | -0.973271 |
| B                                                           | -1.309982 | -0.001871 | -1.461811 | H                                                            | -1.458333 | 0.343669  | 2.578843  |
| B                                                           | -0.417235 | -1.461180 | -0.935618 | H                                                            | 1.458459  | 0.342633  | 2.578657  |
| Al                                                          | 1.522478  | -1.245671 | -0.000473 | H                                                            | 2.420787  | 1.926980  | 0.000883  |
| B                                                           | 0.489719  | 0.000772  | -1.613034 | H                                                            | 0.000810  | 2.732136  | -1.522293 |
| H                                                           | -0.514227 | -2.489038 | 1.562431  | H                                                            | 1.458448  | 0.345386  | -2.578604 |
| H                                                           | 0.917551  | 0.001470  | 2.744208  | H                                                            | -1.458393 | 0.346449  | -2.578765 |
| H                                                           | -0.521941 | 2.487642  | 1.563021  | H                                                            | -0.000561 | -2.266671 | 1.662306  |
| H                                                           | -2.867514 | 1.527637  | 0.002956  | H                                                            | 0.000760  | 2.730586  | 1.524889  |
| H                                                           | -0.525240 | 2.487321  | -1.563883 | H                                                            | -0.000533 | -2.265330 | -1.663949 |
| H                                                           | -1.977141 | -0.002755 | -2.463939 | H                                                            | -3.291400 | -1.740865 | -0.000572 |
| H                                                           | 2.680771  | -2.383169 | -0.005009 | H                                                            | -2.420113 | 1.928187  | 0.000805  |
| H                                                           | -1.971439 | -0.002414 | 2.467052  | H                                                            | 3.292177  | -1.739487 | 0.000364  |
| H                                                           | 0.911866  | 0.001371  | -2.745487 | <i>1,12</i> -Al <sub>2</sub> B <sub>10</sub> H <sub>12</sub> |           |           |           |
| H                                                           | -0.517031 | -2.488701 | -1.562948 | B                                                            | 0.747197  | -1.455498 | -0.643430 |
| H                                                           | -2.862441 | -1.534991 | 0.002782  | Al                                                           | 2.210456  | -0.001310 | -0.000627 |
| H                                                           | 2.674668  | 2.389925  | -0.000587 | B                                                            | 0.747769  | -1.062886 | 1.184359  |
|                                                             |           |           |           | B                                                            | -0.749701 | -1.555169 | 0.334698  |
|                                                             |           |           |           | B                                                            | -0.749663 | -0.798756 | -1.375153 |
|                                                             |           |           |           | B                                                            | 0.747429  | 0.161265  | -1.582816 |
|                                                             |           |           |           | Al                                                           | -2.209282 | 0.002469  | 0.001209  |
|                                                             |           |           |           | B                                                            | -0.748319 | 1.062445  | -1.185254 |
|                                                             |           |           |           | B                                                            | 0.748774  | 1.555684  | -0.335912 |
|                                                             |           |           |           | B                                                            | 0.748620  | 0.798274  | 1.376375  |
|                                                             |           |           |           | B                                                            | -0.747962 | -0.162172 | 1.583182  |
|                                                             |           |           |           | B                                                            | -0.746651 | 1.456963  | 0.643978  |
|                                                             |           |           |           | H                                                            | 1.199466  | -1.811131 | 2.019619  |
|                                                             |           |           |           | H                                                            | -1.204146 | -2.650430 | 0.570070  |
|                                                             |           |           |           | H                                                            | -1.203621 | -1.361813 | -2.343860 |
|                                                             |           |           |           | H                                                            | 1.199354  | 0.274997  | -2.698371 |
|                                                             |           |           |           | H                                                            | -1.199808 | 1.811673  | -2.019749 |
|                                                             |           |           |           | H                                                            | 1.201945  | 2.651309  | -0.571915 |
|                                                             |           |           |           | H                                                            | -1.199551 | -0.274868 | 2.698978  |
| <i>1,7</i> -Al <sub>2</sub> B <sub>10</sub> H <sub>12</sub> |           |           |           |                                                              |           |           |           |
| B                                                           | 0.000357  | 1.699418  | 0.902651  |                                                              |           |           |           |
| B                                                           | -1.464212 | 1.189976  | 0.000436  |                                                              |           |           |           |
| B                                                           | -0.897897 | 0.261684  | 1.510851  |                                                              |           |           |           |

|   |           |           |           |
|---|-----------|-----------|-----------|
| H | 1.198134  | -2.481378 | -1.097212 |
| H | -1.197007 | 2.482911  | 1.098084  |
| H | 1.201432  | 1.361492  | 2.345511  |
| H | 3.825103  | -0.000376 | -0.000303 |
| H | -3.824029 | -0.018212 | -0.008556 |

|   |           |           |           |
|---|-----------|-----------|-----------|
| H | 0.000009  | -1.999298 | -1.681926 |
| H | -3.267261 | -1.457107 | -0.000307 |
| H | -2.419634 | 2.203717  | 0.000309  |
| H | 3.268111  | -1.455320 | 0.001054  |

1,2-Ga<sub>2</sub>B<sub>10</sub>H<sub>12</sub>

|    |           |           |           |
|----|-----------|-----------|-----------|
| B  | 1.754047  | 0.000637  | 1.461872  |
| B  | 2.280542  | 0.900511  | 0.000095  |
| B  | 0.863230  | 1.463317  | 0.941409  |
| B  | -0.033038 | 0.000112  | 1.628905  |
| B  | 0.863581  | -1.462431 | 0.941993  |
| B  | 2.281163  | -0.899950 | 0.000818  |
| Ga | -1.084682 | -1.230614 | -0.000115 |
| B  | 0.864272  | -1.463086 | -0.941652 |
| B  | 1.755440  | -0.000136 | -1.461267 |
| B  | 0.863829  | 1.462739  | -0.942472 |
| Ga | -1.084935 | 1.230455  | 0.000005  |
| B  | -0.032176 | -0.000792 | -1.628883 |
| H  | 0.966995  | 2.490696  | 1.565097  |
| H  | -0.480320 | 0.000090  | 2.749308  |
| H  | 0.967566  | -2.489497 | 1.566199  |
| H  | 3.304274  | -1.531433 | 0.001871  |
| H  | 0.968357  | -2.490481 | -1.565234 |
| H  | 2.425976  | -0.000373 | -2.460570 |
| H  | -2.207768 | 2.368094  | -0.004321 |
| H  | 2.423280  | 0.000933  | 2.462052  |
| H  | -0.478838 | -0.001190 | -2.749577 |
| H  | 0.967701  | 2.489663  | -1.566776 |
| H  | 3.303659  | 1.532128  | 0.000738  |
| H  | -2.207194 | -2.368319 | 0.000514  |

1,12-Ga<sub>2</sub>B<sub>10</sub>H<sub>12</sub>

|    |           |           |           |
|----|-----------|-----------|-----------|
| B  | -0.745587 | -0.860100 | -1.349522 |
| Ga | -2.205825 | 0.000400  | 0.000250  |
| B  | -0.743502 | 1.017347  | -1.235034 |
| B  | 0.743726  | 0.096839  | -1.596437 |
| B  | 0.743606  | -1.487957 | -0.586765 |
| B  | -0.744095 | -1.550338 | 0.399363  |
| Ga | 2.205057  | 0.000628  | 0.001048  |
| B  | 0.744426  | -1.019451 | 1.233328  |
| B  | -0.742413 | -0.099633 | 1.597404  |
| B  | -0.742084 | 1.490043  | 0.585024  |
| B  | 0.744979  | 1.549616  | -0.401680 |
| B  | 0.744762  | 0.860578  | 1.350742  |
| H  | -1.195249 | 1.729972  | -2.098417 |
| H  | 1.195925  | 0.164160  | -2.713725 |
| H  | 1.196298  | -2.528915 | -0.997820 |
| H  | -1.195752 | -2.634110 | -0.679754 |
| H  | 1.196070  | -1.730960 | 2.097749  |
| H  | -1.192988 | -0.168074 | 2.715127  |
| H  | 1.196317  | 2.633942  | -0.680659 |
| H  | -1.197380 | -1.461294 | -2.293793 |
| H  | 1.195507  | 1.462208  | 2.295194  |
| H  | -1.193331 | 2.531646  | 0.995653  |
| H  | -3.793021 | 0.001664  | 0.003909  |
| H  | 3.792329  | -0.016834 | -0.025324 |

1,7-Ga<sub>2</sub>B<sub>10</sub>H<sub>12</sub>

|    |           |           |           |
|----|-----------|-----------|-----------|
| B  | -0.000002 | 1.965404  | 0.902245  |
| B  | -1.465261 | 1.466151  | 0.000136  |
| B  | -0.895708 | 0.533276  | 1.518374  |
| B  | 0.895653  | 0.533007  | 1.518270  |
| B  | 1.465241  | 1.465982  | 0.000394  |
| B  | 0.000019  | 1.965837  | -0.901372 |
| Ga | 1.891791  | -0.659200 | -0.000146 |
| B  | 0.895759  | 0.533681  | -1.518251 |
| B  | -0.895651 | 0.533968  | -1.518489 |
| Ga | -1.891832 | -0.659206 | -0.000050 |
| B  | -0.000017 | -1.007804 | 0.986214  |
| B  | 0.000006  | -1.007135 | -0.986789 |
| H  | -1.455692 | 0.616622  | 2.584597  |
| H  | 1.455553  | 0.615879  | 2.584589  |
| H  | 2.419595  | 2.203567  | 0.000610  |
| H  | 0.000188  | 2.998003  | -1.520604 |
| H  | 1.455767  | 0.617432  | -2.584431 |
| H  | -1.455640 | 0.618158  | -2.584611 |
| H  | 0.000101  | -2.000108 | 1.681090  |
| H  | -0.000005 | 2.997221  | 1.522054  |

1,2-In<sub>2</sub>B<sub>10</sub>H<sub>12</sub>

|    |           |           |           |
|----|-----------|-----------|-----------|
| B  | -2.187229 | -0.005424 | 1.467151  |
| B  | -2.652807 | -0.914110 | -0.000911 |
| B  | -1.232470 | -1.433965 | 0.960583  |
| B  | -0.421956 | -0.001218 | 1.701200  |
| B  | -1.239100 | 1.428105  | 0.961761  |
| B  | -2.656688 | 0.902326  | 0.000000  |
| In | 0.934964  | 1.353659  | 0.000000  |
| B  | -1.238914 | 1.429045  | -0.960445 |
| B  | -2.185969 | -0.003942 | -1.467830 |
| B  | -1.231967 | -1.433013 | -0.961883 |
| In | 0.941129  | -1.349747 | 0.000000  |
| B  | -0.420932 | 0.000255  | -1.700484 |
| H  | -1.325554 | -2.489969 | 1.537767  |
| H  | 0.033293  | -0.001094 | 2.816789  |
| H  | -1.336789 | 2.483412  | 1.539428  |
| H  | -3.665400 | 1.556747  | 0.000000  |

|   |           |           |           |   |           |           |           |
|---|-----------|-----------|-----------|---|-----------|-----------|-----------|
| H | -1.335549 | 2.484994  | -1.537123 | H | 1.165571  | 1.167006  | -2.480891 |
| H | -2.884818 | -0.005342 | -2.447795 | H | -1.166797 | 2.404936  | -1.318614 |
| H | 1.886908  | -2.841109 | -0.002306 | H | -1.166672 | 2.003024  | 1.873082  |
| H | -2.887105 | -0.007661 | 2.446365  | H | 1.166733  | 0.515498  | 2.693064  |
| H | 0.034453  | 0.001592  | -2.816057 | H | -1.166893 | -1.164348 | 2.482818  |
| H | -1.323901 | -2.488656 | -1.539937 | H | 1.162617  | -2.401081 | 1.321378  |
| H | -3.658566 | -1.573065 | -0.001558 | H | -1.167606 | -0.512484 | -2.694105 |
| H | 1.874655  | 2.848172  | 0.001925  | H | 1.168349  | 2.721346  | 0.342449  |
|   |           |           |           | H | -1.166795 | -2.722287 | -0.342676 |
|   |           |           |           | H | 1.162524  | -1.998899 | -1.874241 |
|   |           |           |           | H | 4.162576  | -0.009656 | -0.001669 |
|   |           |           |           | H | -4.162181 | 0.032365  | 0.005634  |

1,7-In<sub>2</sub>B<sub>10</sub>H<sub>12</sub>

|    |           |           |           |
|----|-----------|-----------|-----------|
| B  | 0.000006  | 2.184554  | 0.902926  |
| B  | -1.465610 | 1.694153  | 0.000133  |
| B  | -0.894123 | 0.757811  | 1.528640  |
| B  | 0.894315  | 0.757743  | 1.528315  |
| B  | 1.465532  | 1.693771  | -0.000184 |
| B  | -0.000136 | 2.184490  | -0.903156 |
| In | 2.087208  | -0.554909 | -0.000017 |
| B  | 0.894117  | 0.757615  | -1.528479 |
| B  | -0.894383 | 0.757529  | -1.528351 |
| In | -2.087223 | -0.554864 | -0.000013 |
| B  | 0.000009  | -0.796204 | 0.997481  |
| B  | 0.000007  | -0.796280 | -0.997020 |
| H  | -1.430519 | 0.859000  | 2.606394  |
| H  | 1.431069  | 0.859185  | 2.605890  |
| H  | 2.400114  | 2.457296  | -0.000315 |
| H  | -0.000151 | 3.218537  | -1.519648 |
| H  | 1.430756  | 0.858874  | -2.606110 |
| H  | -1.431110 | 0.858702  | -2.605938 |
| H  | -0.000143 | -1.779499 | 1.709579  |
| H  | 0.000185  | 3.218708  | 1.519255  |
| H  | -0.000412 | -1.779761 | -1.708874 |
| H  | -3.603148 | -1.414662 | -0.000022 |
| H  | -2.400103 | 2.457867  | 0.000024  |
| H  | 3.605529  | -1.411254 | -0.000271 |

1,2-Tl<sub>2</sub>B<sub>10</sub>H<sub>12</sub>

|    |           |           |           |
|----|-----------|-----------|-----------|
| B  | 0.057686  | 2.644364  | 1.479886  |
| B  | -0.837620 | 3.064719  | -0.006362 |
| B  | -1.369499 | 1.668816  | 0.983040  |
| B  | 0.011687  | 0.904174  | 1.770305  |
| B  | 1.440545  | 1.596416  | 1.003259  |
| B  | 0.994959  | 3.017149  | 0.006756  |
| Tl | 1.413577  | -0.759661 | 0.000307  |
| B  | 1.454182  | 1.598464  | -0.984603 |
| B  | 0.077654  | 2.643750  | -1.479857 |
| B  | -1.355920 | 1.666552  | -1.001198 |
| Tl | -1.450953 | -0.696545 | -0.000443 |
| B  | 0.033640  | 0.904390  | -1.770345 |
| H  | -2.458608 | 1.761913  | 1.493890  |
| H  | -0.008358 | 0.393468  | 2.860632  |
| H  | 2.526277  | 1.633507  | 1.528157  |
| H  | 1.698841  | 3.992454  | 0.011699  |
| H  | 2.546588  | 1.634850  | -1.495488 |
| H  | 0.103974  | 3.393654  | -2.422050 |
| H  | -3.207408 | -1.422823 | -0.015824 |
| H  | 0.070776  | 3.394833  | 2.421883  |
| H  | 0.029381  | 0.393058  | -2.860565 |
| H  | -2.438177 | 1.759034  | -1.526679 |
| H  | -1.490299 | 4.074974  | -0.011482 |
| H  | 3.117895  | -1.600245 | 0.022464  |

1,12-In<sub>2</sub>B<sub>10</sub>H<sub>12</sub>

|    |           |           |           |
|----|-----------|-----------|-----------|
| B  | 0.739128  | 1.601480  | 0.201243  |
| In | 2.424220  | -0.000966 | -0.000259 |
| B  | 0.736896  | 0.687613  | -1.458749 |
| B  | -0.736302 | 1.415019  | -0.776717 |
| B  | -0.736006 | 1.178827  | 1.102295  |
| B  | 0.737387  | 0.305004  | 1.584213  |
| In | -2.423137 | -0.001449 | -0.000185 |
| B  | -0.738659 | -0.683339 | 1.461238  |
| B  | 0.734036  | -1.411066 | 0.778460  |
| B  | 0.733749  | -1.174812 | -1.102586 |
| B  | -0.739011 | -0.300539 | -1.585230 |
| B  | -0.740120 | -1.601607 | -0.201056 |

1,7-Tl<sub>2</sub>B<sub>10</sub>H<sub>12</sub>

|    |           |           |           |
|----|-----------|-----------|-----------|
| B  | 0.002215  | 2.755436  | 0.872042  |
| B  | -1.435549 | 2.138084  | 0.000061  |
| B  | -0.923091 | 1.351542  | 1.554593  |
| B  | 0.924438  | 1.349600  | 1.554925  |
| B  | 1.438863  | 2.134929  | 0.000359  |
| B  | 0.002344  | 2.755892  | -0.871161 |
| Tl | 1.804648  | -0.556714 | -0.000086 |



|    |           |           |           |
|----|-----------|-----------|-----------|
| B  | 0.924490  | 1.350767  | -1.554902 |
| B  | -0.922630 | 1.352239  | -1.554693 |
| Tl | -1.805388 | -0.555819 | -0.000095 |
| B  | -0.000801 | -0.147708 | 1.711028  |
| B  | -0.000511 | -0.147318 | -1.710696 |
| H  | -1.597282 | 1.509607  | 2.545987  |
| H  | 1.598470  | 1.506418  | 2.546621  |
| H  | 2.445388  | 2.798488  | 0.000633  |
| H  | 0.003383  | 3.786359  | -1.494761 |
| H  | 1.598830  | 1.507711  | -2.546335 |
| H  | -1.596929 | 1.510457  | -2.545966 |
| H  | -0.001176 | -0.991598 | 2.562337  |
| H  | 0.003154  | 3.785569  | 1.496181  |
| H  | -0.000762 | -0.990832 | -2.562381 |
| H  | -3.680890 | -0.787990 | 0.001625  |
| H  | -2.440795 | 2.803746  | 0.000097  |
| H  | 3.679708  | -0.790075 | 0.002818  |

|   |           |           |           |
|---|-----------|-----------|-----------|
| B | 0.780558  | -0.478165 | 1.465225  |
| B | 0.780558  | 1.224021  | -0.899560 |
| B | 0.780558  | 1.224021  | 0.899560  |
| B | -0.735747 | 0.450414  | 1.461566  |
| C | -1.513993 | -0.030883 | 0.000000  |
| B | -0.735747 | 0.450414  | -1.461566 |
| C | -0.660216 | 1.362751  | 0.000000  |
| H | -1.244594 | 2.277579  | 0.000000  |
| H | 1.299164  | -2.603688 | 0.000000  |
| H | -1.416291 | -2.022333 | -1.485873 |
| H | 1.284421  | -0.787560 | -2.492374 |
| H | 2.911021  | 0.024474  | 0.000000  |
| H | 1.284421  | -0.787560 | 2.492374  |
| H | 1.157925  | 2.180386  | -1.486567 |
| H | 1.157925  | 2.180386  | 1.486567  |
| H | -1.416864 | 0.868037  | 2.333496  |
| H | -2.594491 | 0.074480  | 0.000000  |
| H | -1.416864 | 0.868037  | -2.333496 |
| H | -1.416291 | -2.022333 | 1.485873  |

1,12-Tl<sub>2</sub>B<sub>10</sub>H<sub>12</sub>

|    |           |           |           |
|----|-----------|-----------|-----------|
| B  | -0.741176 | 0.187030  | 1.625619  |
| Tl | -2.572933 | -0.000622 | -0.003199 |
| B  | -0.732660 | -1.481950 | 0.683775  |
| B  | 0.720185  | -0.796258 | 1.429919  |
| B  | 0.720412  | 1.100170  | 1.212564  |
| B  | -0.732574 | 1.599022  | 0.330728  |
| Tl | 2.572629  | -0.000743 | -0.004321 |
| B  | 0.732237  | 1.490526  | -0.659979 |
| B  | -0.715782 | 0.804754  | -1.412479 |
| B  | -0.715752 | -1.101804 | -1.194665 |
| B  | 0.731630  | -1.600313 | -0.306447 |
| B  | 0.738394  | -0.184142 | -1.614854 |
| H  | -1.157632 | -2.510891 | 1.147224  |
| H  | 1.140688  | -1.348496 | 2.416500  |
| H  | 1.141413  | 1.860797  | 2.048846  |
| H  | -1.157767 | 2.706010  | 0.549696  |
| H  | 1.155705  | 2.518125  | -1.127456 |
| H  | -1.132813 | 1.357198  | -2.400108 |
| H  | 1.154714  | -2.707146 | -0.529292 |
| H  | -1.169348 | 0.315094  | 2.745497  |
| H  | 1.161061  | -0.312955 | -2.736228 |
| H  | -1.132601 | -1.863228 | -2.031879 |
| H  | -4.380915 | -0.003713 | -0.061064 |
| H  | 4.377574  | 0.014599  | 0.116442  |

1,7-C<sub>2</sub>B<sub>10</sub>H<sub>12</sub>

|   |           |           |           |
|---|-----------|-----------|-----------|
| B | -1.704439 | 0.012624  | 0.000000  |
| C | -0.685013 | -1.371389 | 0.000000  |
| B | -0.766759 | -0.457777 | 1.455130  |
| B | -0.777289 | 1.249403  | 0.903483  |
| B | -0.777289 | 1.249403  | -0.903483 |
| B | -0.766759 | -0.457777 | -1.455130 |
| B | 0.744036  | 1.533520  | 0.000000  |
| B | 0.748775  | 0.485787  | -1.456612 |
| B | 0.748775  | -1.203510 | -0.899139 |
| B | 0.748775  | -1.203510 | 0.899139  |
| B | 0.748775  | 0.485787  | 1.456612  |
| C | 1.532708  | 0.008423  | 0.000000  |
| H | 2.618550  | -0.006176 | 0.000000  |
| H | -2.878179 | -0.142541 | 0.000000  |
| H | -1.308688 | -0.918682 | 2.401077  |
| H | -1.305021 | 2.099047  | 1.538918  |
| H | -1.305021 | 2.099047  | -1.538918 |
| H | -1.308688 | -0.918682 | -2.401077 |
| H | 1.403403  | 2.516894  | 0.000000  |
| H | 1.401359  | 0.767880  | -2.402912 |
| H | 1.307217  | -2.102586 | -1.425500 |
| H | 1.307217  | -2.102586 | 1.425500  |
| H | 1.401359  | 0.767880  | 2.402912  |
| H | -1.152691 | -2.351453 | 0.000000  |

1,2-C<sub>2</sub>B<sub>10</sub>H<sub>12</sub>

|   |           |           |           |
|---|-----------|-----------|-----------|
| B | 0.786921  | -1.534565 | 0.000000  |
| B | -0.736225 | -1.251152 | 0.899051  |
| B | -0.736225 | -1.251152 | -0.899051 |
| B | 0.780558  | -0.478165 | -1.465225 |
| B | 1.725944  | -0.003895 | 0.000000  |

1,12-C<sub>2</sub>B<sub>10</sub>H<sub>12</sub>

|   |          |          |          |
|---|----------|----------|----------|
| C | 0.000000 | 0.000000 | 1.528081 |
|---|----------|----------|----------|

|   |           |           |           |
|---|-----------|-----------|-----------|
| B | 0.000000  | 1.528642  | 0.754137  |
| B | -1.453825 | 0.472376  | 0.754137  |
| B | -0.898513 | -1.236697 | 0.754137  |
| B | 0.898513  | -1.236697 | 0.754137  |
| B | 1.453825  | 0.472376  | 0.754137  |
| B | 0.000000  | -1.528642 | -0.754137 |
| B | 1.453825  | -0.472376 | -0.754137 |
| B | 0.898513  | 1.236697  | -0.754137 |
| B | -0.898513 | 1.236697  | -0.754137 |
| B | -1.453825 | -0.472376 | -0.754137 |
| C | 0.000000  | 0.000000  | -1.528081 |
| H | 0.000000  | 0.000000  | -2.614168 |
| H | 0.000000  | 0.000000  | 2.614168  |
| H | -2.402563 | 0.780640  | 1.390127  |
| H | -1.484866 | -2.043742 | 1.390127  |
| H | 1.484866  | -2.043742 | 1.390127  |
| H | 2.402563  | 0.780640  | 1.390127  |
| H | 0.000000  | -2.526204 | -1.390127 |
| H | 2.402563  | -0.780640 | -1.390127 |
| H | 1.484866  | 2.043742  | -1.390127 |
| H | -1.484866 | 2.043742  | -1.390127 |
| H | -2.402563 | -0.780640 | -1.390127 |
| H | 0.000000  | 2.526204  | 1.390127  |

1,7-Si<sub>2</sub>B<sub>10</sub>H<sub>12</sub>

|    |           |           |           |
|----|-----------|-----------|-----------|
| B  | 0.610559  | 1.781973  | 0.000000  |
| B  | 0.620578  | 0.688608  | 1.534598  |
| Si | 1.881720  | 0.191807  | 0.000000  |
| B  | 0.620578  | 0.688608  | -1.534598 |
| B  | -0.891901 | 1.433241  | -0.906223 |
| B  | -0.891901 | 1.433241  | 0.906223  |
| B  | -0.891901 | -0.252569 | -1.534627 |
| B  | -1.868419 | 0.239371  | 0.000000  |
| B  | -0.891901 | -0.252569 | 1.534627  |
| B  | 0.684278  | -1.099641 | 1.022065  |
| B  | 0.684278  | -1.099641 | -1.022065 |
| Si | -1.003279 | -1.603427 | 0.000000  |
| H  | -1.649546 | -2.919339 | 0.000000  |
| H  | 1.118772  | 2.855840  | 0.000000  |
| H  | 3.347727  | 0.190323  | 0.000000  |
| H  | 1.137018  | 1.021893  | -2.551608 |
| H  | -1.425861 | 2.291318  | -1.527186 |
| H  | -1.425861 | 2.291318  | 1.527186  |
| H  | -1.419044 | -0.568632 | -2.551643 |
| H  | -3.056327 | 0.257794  | 0.000000  |
| H  | -1.419044 | -0.568632 | 2.551643  |
| H  | 1.217867  | -1.957102 | 1.652038  |
| H  | 1.217867  | -1.957102 | -1.652038 |
| H  | 1.137018  | 1.021893  | 2.551608  |

1,2-Si<sub>2</sub>B<sub>10</sub>H<sub>12</sub>

|    |           |           |           |
|----|-----------|-----------|-----------|
| B  | 1.055156  | -1.722693 | 0.000000  |
| B  | 1.069996  | -0.673400 | 1.465938  |
| B  | -0.442114 | -1.482237 | 0.951635  |
| B  | -0.442114 | -1.482237 | -0.951635 |
| B  | 1.069996  | -0.673400 | -1.465938 |
| B  | 2.008498  | -0.205683 | 0.000000  |
| B  | -0.442114 | 0.278449  | -1.601060 |
| B  | 1.145374  | 1.040224  | -0.951726 |
| B  | 1.145374  | 1.040224  | 0.951726  |
| B  | -0.442114 | 0.278449  | 1.601060  |
| Si | -1.749493 | -0.261460 | 0.000000  |
| Si | -0.521449 | 1.690138  | 0.000000  |
| H  | -1.127037 | 3.027457  | 0.000000  |
| H  | 1.570486  | -2.790902 | 0.000000  |
| H  | -0.971119 | -2.343069 | 1.578358  |
| H  | -0.971119 | -2.343069 | -1.578358 |
| H  | 1.592564  | -1.001312 | -2.479366 |
| H  | 3.194591  | -0.205909 | 0.000000  |
| H  | -0.941732 | 0.592241  | -2.632871 |
| H  | 1.691573  | 1.890175  | -1.578499 |
| H  | 1.691573  | 1.890175  | 1.578499  |
| H  | -0.941732 | 0.592241  | 2.632871  |
| H  | -3.217123 | -0.296691 | 0.000000  |
| H  | 1.592564  | -1.001312 | 2.479366  |

1,12-Si<sub>2</sub>B<sub>10</sub>H<sub>12</sub>

|    |           |           |           |
|----|-----------|-----------|-----------|
| Si | 0.000000  | 0.000000  | 1.980256  |
| B  | 0.000000  | 1.614985  | 0.737434  |
| B  | -1.535942 | 0.499058  | 0.737434  |
| B  | -0.949264 | -1.306550 | 0.737434  |
| B  | 0.949264  | -1.306550 | 0.737434  |
| B  | 1.535942  | 0.499058  | 0.737434  |
| B  | 0.000000  | -1.614985 | -0.737434 |
| B  | 1.535942  | -0.499058 | -0.737434 |
| B  | 0.949264  | 1.306550  | -0.737434 |
| B  | -0.949264 | 1.306550  | -0.737434 |
| B  | -1.535942 | -0.499058 | -0.737434 |
| Si | 0.000000  | 0.000000  | -1.980256 |
| H  | 0.000000  | 0.000000  | -3.444831 |
| H  | 0.000000  | 0.000000  | 3.444831  |
| H  | -2.553325 | 0.829626  | 1.253656  |
| H  | -1.578042 | -2.171988 | 1.253656  |
| H  | 1.578042  | -2.171988 | 1.253656  |
| H  | 2.553325  | 0.829626  | 1.253656  |
| H  | 0.000000  | -2.684725 | -1.253656 |
| H  | 2.553325  | -0.829626 | -1.253656 |
| H  | 1.578042  | 2.171988  | -1.253656 |
| H  | -1.578042 | 2.171988  | -1.253656 |
| H  | -2.553325 | -0.829626 | -1.253656 |
| H  | 0.000000  | 2.684725  | 1.253656  |

|   |           |           |          |
|---|-----------|-----------|----------|
| H | 1.502682  | 0.565771  | 2.570841 |
| H | -3.076578 | -1.403173 | 0.000000 |

1,2-Ge<sub>2</sub>B<sub>10</sub>H<sub>10</sub>

|    |           |           |           |
|----|-----------|-----------|-----------|
| B  | -2.229504 | -0.901237 | 0.000478  |
| B  | -0.844736 | -1.491210 | 0.963880  |
| B  | -1.695220 | -0.001903 | 1.465943  |
| B  | -2.232134 | 0.894321  | -0.000340 |
| B  | -1.695378 | -0.003348 | -1.465747 |
| B  | -0.845222 | -1.492259 | -0.963075 |
| B  | -0.849950 | 1.488771  | -0.964386 |
| B  | 0.074667  | -0.000281 | -1.650736 |
| Ge | 1.007511  | -1.214795 | -0.000092 |
| B  | 0.074845  | 0.000245  | 1.650701  |
| B  | -0.850076 | 1.489807  | 0.963602  |
| Ge | 1.003255  | 1.217900  | 0.000045  |
| H  | 2.225946  | 2.134122  | -0.004179 |
| H  | -3.233514 | -1.532996 | 0.000854  |
| H  | -2.324645 | -0.002961 | 2.472316  |
| H  | -3.238364 | 1.522575  | -0.000787 |
| H  | -2.324870 | -0.004616 | -2.472081 |
| H  | -0.875983 | -2.507386 | -1.581270 |
| H  | -0.883186 | 2.503341  | -1.583361 |
| H  | 0.649267  | 0.000463  | -2.690455 |
| H  | 2.233648  | -2.127294 | 0.003864  |
| H  | 0.649595  | 0.001624  | 2.690338  |
| H  | -0.883433 | 2.504791  | 1.581874  |
| H  | -0.875415 | -2.505571 | 1.582779  |

1,12-Ge<sub>2</sub>B<sub>10</sub>H<sub>10</sub>

|    |           |           |           |
|----|-----------|-----------|-----------|
| Ge | 2.073159  | -0.000747 | -0.000012 |
| B  | 0.727917  | 1.634833  | 0.034869  |
| B  | 0.728299  | 0.473377  | 1.564950  |
| B  | 0.729235  | -1.343566 | 0.933122  |
| B  | 0.729239  | -1.302520 | -0.989558 |
| B  | 0.728326  | 0.539725  | -1.543346 |
| B  | -0.726596 | -1.633040 | -0.034829 |
| B  | -0.727555 | -0.471475 | -1.564159 |
| B  | -0.729006 | 1.343497  | -0.931701 |
| B  | -0.729007 | 1.302514  | 0.988137  |
| B  | -0.727583 | -0.537790 | 1.542636  |
| Ge | -2.073550 | -0.000215 | -0.000009 |
| H  | -3.595922 | -0.014004 | -0.000309 |
| H  | 3.594186  | 0.013973  | 0.000308  |
| H  | 1.233935  | 0.782729  | 2.594902  |
| H  | 1.235421  | -2.226286 | 1.546815  |
| H  | 1.235419  | -2.158272 | -1.640335 |
| H  | 1.233972  | 0.892704  | -2.559170 |
| H  | -1.234299 | -2.707316 | -0.057749 |
| H  | -1.234560 | -0.781427 | -2.593333 |
| H  | -1.236219 | 2.225741  | -1.545351 |
| H  | -1.236215 | 2.157792  | 1.638850  |
| H  | -1.234599 | -0.891338 | 2.557656  |
| H  | 1.235058  | 2.708733  | 0.057781  |

1,7-Ge<sub>2</sub>B<sub>10</sub>H<sub>10</sub>

|    |           |           |           |
|----|-----------|-----------|-----------|
| B  | -1.461050 | 1.467190  | 0.000000  |
| Ge | -1.763384 | -0.629033 | 0.000000  |
| B  | -0.888238 | 0.538116  | 1.553934  |
| B  | -0.000002 | 1.956488  | 0.903911  |
| B  | -0.000002 | 1.956488  | -0.903911 |
| B  | -0.888238 | 0.538116  | -1.553934 |
| B  | 1.461042  | 1.467192  | 0.000000  |
| B  | 0.888241  | 0.538121  | -1.553931 |
| B  | 0.000004  | -1.032371 | -1.097586 |
| B  | 0.000004  | -1.032371 | 1.097586  |
| B  | 0.888241  | 0.538121  | 1.553931  |
| Ge | 1.763383  | -0.629036 | 0.000000  |
| H  | 3.076621  | -1.403098 | 0.000000  |
| H  | -2.449656 | 2.125562  | 0.000000  |
| H  | -1.502678 | 0.565763  | 2.570846  |
| H  | -0.000005 | 2.973059  | 1.515988  |
| H  | -0.000005 | 2.973058  | -1.515988 |
| H  | -1.502677 | 0.565763  | -2.570846 |
| H  | 2.449642  | 2.125573  | 0.000000  |
| H  | 1.502682  | 0.565770  | -2.570841 |
| H  | -0.000004 | -2.035646 | -1.737549 |
| H  | -0.000004 | -2.035646 | 1.737549  |

1,2-Sn<sub>2</sub>B<sub>10</sub>H<sub>10</sub>

|    |           |           |           |
|----|-----------|-----------|-----------|
| B  | 1.403096  | 2.347931  | -0.004237 |
| B  | 1.675184  | 0.881410  | -0.987664 |
| B  | 0.416020  | 2.056685  | -1.469547 |
| B  | -0.367149 | 2.708444  | 0.002946  |
| B  | 0.426757  | 2.055289  | 1.468549  |
| B  | 1.681433  | 0.880716  | 0.977033  |
| B  | -1.191995 | 1.465570  | 0.986863  |
| B  | 0.078717  | 0.347231  | 1.740175  |
| Sn | 1.138085  | -1.125263 | 0.000248  |
| B  | 0.069464  | 0.347431  | -1.738217 |
| B  | -1.198203 | 1.468010  | -0.977119 |
| Sn | -1.490944 | -0.590386 | 0.000033  |
| H  | -2.950241 | -1.455671 | 0.010709  |
| H  | 2.235553  | 3.194446  | -0.005859 |
| H  | 0.542250  | 2.699055  | -2.461076 |
| H  | -0.802095 | 3.813117  | 0.005848  |
| H  | 0.560117  | 2.696510  | 2.459901  |

## Electronic Supplementary Information for Dalton Transactions

This journal is © The Royal Society of Chemistry 2005

|   |           |           |           |
|---|-----------|-----------|-----------|
| H | 2.712475  | 0.731754  | 1.555150  |
| H | -2.195148 | 1.731060  | 1.572215  |
| H | -0.028651 | -0.198908 | 2.790153  |
| H | 2.150136  | -2.488051 | -0.018683 |
| H | -0.045693 | -0.194908 | -2.789415 |
| H | -2.205326 | 1.733653  | -1.555610 |
| H | 2.702955  | 0.726809  | -1.571316 |

|   |           |           |           |
|---|-----------|-----------|-----------|
| H | 3.978268  | -0.001797 | -0.036279 |
| H | 1.193989  | 2.564015  | -0.975105 |
| H | 1.194836  | 1.718628  | 2.141233  |
| H | 1.194628  | -1.505738 | 2.295910  |
| H | 1.193991  | -2.645780 | -0.725237 |
| H | -1.193115 | 0.131245  | 2.740099  |
| H | -1.195358 | -2.565716 | 0.974526  |
| H | -1.196975 | -1.717969 | -2.142160 |
| H | -1.196774 | 1.505023  | -2.296764 |
| H | -1.195381 | 2.647410  | 0.724519  |
| H | 1.195961  | -0.131080 | -2.736188 |

1, 7-Sn<sub>2</sub>B<sub>10</sub>H<sub>10</sub>

|    |           |           |           |
|----|-----------|-----------|-----------|
| B  | -1.451605 | 1.718959  | 0.000000  |
| Sn | -1.763344 | -0.604167 | 0.000000  |
| B  | -0.903027 | 0.881693  | 1.584810  |
| B  | -0.000039 | 2.274256  | 0.884161  |
| B  | -0.000039 | 2.274256  | -0.884161 |
| B  | -0.903027 | 0.881694  | -1.584810 |
| B  | 1.451537  | 1.718989  | 0.000000  |
| B  | 0.902982  | 0.881725  | -1.584823 |
| B  | 0.000005  | -0.677167 | -1.532849 |
| B  | 0.000005  | -0.677167 | 1.532849  |
| B  | 0.902982  | 0.881725  | 1.584823  |
| Sn | 1.763371  | -0.604143 | 0.000000  |
| H  | 3.355622  | -1.184145 | 0.000000  |
| H  | -2.447046 | 2.368777  | 0.000000  |
| H  | -1.574826 | 0.971073  | 2.564425  |
| H  | -0.000051 | 3.293569  | 1.493822  |
| H  | -0.000051 | 3.293569  | -1.493822 |
| H  | -1.574826 | 0.971074  | -2.564425 |
| H  | 2.446952  | 2.368848  | 0.000000  |
| H  | 1.574783  | 0.971138  | -2.564433 |
| H  | -0.000001 | -1.610022 | -2.270024 |
| H  | -0.000001 | -1.610022 | 2.270024  |
| H  | 1.574783  | 0.971138  | 2.564433  |
| H  | -3.355546 | -1.184278 | 0.000000  |

1, 2-Pb<sub>2</sub>B<sub>10</sub>H<sub>10</sub>

|    |           |           |           |
|----|-----------|-----------|-----------|
| B  | 0.906108  | 2.867909  | -0.001606 |
| B  | 1.454061  | 1.489558  | -0.994141 |
| B  | -0.003196 | 2.411958  | -1.469953 |
| B  | -0.908482 | 2.866947  | 0.001598  |
| B  | 0.001519  | 2.411943  | 1.469945  |
| B  | 1.457547  | 1.490681  | 0.990029  |
| B  | -1.455100 | 1.488396  | 0.994524  |
| B  | 0.002207  | 0.687326  | 1.777375  |
| Pb | 1.377472  | -0.647950 | 0.000000  |
| B  | -0.002187 | 0.687315  | -1.777360 |
| B  | -1.458557 | 1.489520  | -0.990438 |
| Pb | -1.377050 | -0.648608 | 0.000000  |
| H  | -2.745422 | -1.702591 | 0.007630  |
| H  | 1.563701  | 3.857446  | -0.002904 |
| H  | -0.005070 | 3.080782  | -2.452872 |
| H  | -1.567064 | 3.855832  | 0.002941  |
| H  | 0.002631  | 3.080762  | 2.452870  |
| H  | 2.509362  | 1.543992  | 1.546678  |
| H  | -2.505260 | 1.540703  | 1.554420  |
| H  | 0.004222  | 0.108223  | 2.814316  |
| H  | 2.748865  | -1.698009 | -0.007940 |
| H  | -0.003854 | 0.108218  | -2.814307 |
| H  | -2.510472 | 1.541810  | -1.546985 |
| H  | 2.504150  | 1.542869  | -1.554083 |

1, 12-Sn<sub>2</sub>B<sub>10</sub>H<sub>10</sub>

|    |           |           |           |
|----|-----------|-----------|-----------|
| Sn | 2.297804  | 0.000015  | 0.000408  |
| B  | 0.716819  | -0.078940 | -1.647768 |
| B  | 0.718279  | 1.544797  | -0.585731 |
| B  | 0.720814  | 1.035402  | 1.289855  |
| B  | 0.720728  | -0.907153 | 1.382958  |
| B  | 0.718293  | -1.593900 | -0.435368 |
| B  | -0.717155 | 0.079057  | 1.650392  |
| B  | -0.718987 | -1.546684 | 0.585776  |
| B  | -0.722924 | -1.036503 | -1.289479 |
| B  | -0.722847 | 0.908307  | -1.382689 |
| B  | -0.719014 | 1.595787  | 0.435221  |
| Sn | -2.297095 | -0.000022 | -0.000551 |
| H  | -3.979549 | 0.001253  | 0.026736  |

1, 7-Pb<sub>2</sub>B<sub>10</sub>H<sub>10</sub>

|    |           |           |           |
|----|-----------|-----------|-----------|
| B  | -1.441956 | 1.981620  | 0.000000  |
| Pb | -1.758265 | -0.484649 | 0.000000  |
| B  | -0.906925 | 1.188373  | 1.568159  |
| B  | -0.000012 | 2.579528  | 0.876878  |
| B  | -0.000012 | 2.579528  | -0.876878 |
| B  | -0.906925 | 1.188373  | -1.568159 |
| B  | 1.441926  | 1.981608  | 0.000000  |
| B  | 0.906888  | 1.188397  | -1.568190 |
| B  | -0.000012 | -0.353315 | -1.654739 |
| B  | -0.000012 | -0.353315 | 1.654739  |

## Electronic Supplementary Information for Dalton Transactions

This journal is © The Royal Society of Chemistry 2005

|    |           |           |           |
|----|-----------|-----------|-----------|
| B  | 0.906888  | 1.188397  | 1.568190  |
| Pb | 1.758276  | -0.484642 | 0.000000  |
| H  | 3.481300  | -0.627593 | 0.000000  |
| H  | -2.461447 | 2.594087  | 0.000000  |
| H  | -1.587298 | 1.258727  | 2.545939  |
| H  | -0.000014 | 3.589287  | 1.503811  |
| H  | -0.000014 | 3.589287  | -1.503811 |
| H  | -1.587298 | 1.258727  | -2.545939 |
| H  | 2.461405  | 2.594101  | 0.000000  |
| H  | 1.587261  | 1.258763  | -2.545968 |
| H  | -0.000020 | -1.255390 | -2.425764 |
| H  | -0.000020 | -1.255390 | 2.425764  |
| H  | 1.587261  | 1.258763  | 2.545968  |
| H  | -3.481289 | -0.627482 | 0.000000  |

|   |           |           |           |
|---|-----------|-----------|-----------|
| B | -1.450160 | -0.882677 | 0.022185  |
| B | -0.000249 | -1.340929 | -0.977243 |
| N | 0.888586  | 0.000653  | -1.249357 |
| B | 0.001759  | 1.343345  | -0.974444 |
| B | -1.448407 | 0.884727  | 0.023689  |
| N | -0.886413 | 0.001867  | -1.250420 |
| H | 1.529210  | -0.003737 | 2.476545  |
| H | 0.000725  | 2.507921  | 1.426332  |
| H | -1.533502 | -0.000928 | 2.474172  |
| H | -0.002827 | -2.510952 | 1.421319  |
| H | 2.410178  | -1.521381 | -0.240365 |
| H | -2.412421 | -1.517435 | -0.244354 |
| H | -0.000281 | -2.219615 | -1.765373 |
| H | 0.003654  | 2.223520  | -1.760883 |
| H | -2.409725 | 1.521475  | -0.241575 |
| H | 2.412516  | 1.518021  | -0.237203 |

1,12-Pb<sub>2</sub>B<sub>10</sub>H<sub>10</sub>

|    |           |           |           |
|----|-----------|-----------|-----------|
| Pb | -2.348179 | -0.000053 | -0.000136 |
| B  | -0.710426 | -0.576697 | -1.557831 |
| B  | -0.713437 | -1.661099 | 0.066561  |
| B  | -0.717237 | -0.449392 | 1.601645  |
| B  | -0.717310 | 1.384148  | 0.923004  |
| B  | -0.713417 | 1.304048  | -1.030755 |
| B  | 0.709471  | 0.576975  | 1.558526  |
| B  | 0.711822  | 1.662009  | -0.063311 |
| B  | 0.717462  | 0.452377  | -1.600501 |
| B  | 0.717548  | -1.385652 | -0.920227 |
| B  | 0.711792  | -1.302637 | 1.033825  |
| Pb | 2.348409  | -0.000274 | -0.000745 |
| H  | 4.041272  | 0.015956  | 0.043299  |
| H  | -4.039851 | -0.012015 | -0.032455 |
| H  | -1.186368 | -2.751768 | 0.107159  |
| H  | -1.192553 | -0.746040 | 2.650788  |
| H  | -1.192646 | 2.292412  | 1.526077  |
| H  | -1.186245 | 2.158262  | -1.710168 |
| H  | 1.182287  | 0.955851  | 2.582250  |
| H  | 1.185892  | 2.752113  | -0.105476 |
| H  | 1.192147  | 0.748192  | -2.650078 |
| H  | 1.192259  | -2.293558 | -1.524184 |
| H  | 1.185755  | -2.157456 | 1.711668  |
| H  | -1.182100 | -0.955479 | -2.581347 |

1,7-N<sub>2</sub>B<sub>10</sub>H<sub>10</sub>

|   |           |           |           |
|---|-----------|-----------|-----------|
| B | -0.000005 | 0.888830  | -1.433501 |
| N | 0.000005  | -0.807403 | -1.280437 |
| B | -1.437245 | -0.001386 | -0.896039 |
| B | -0.903246 | 1.460849  | 0.002771  |
| B | 0.903230  | 1.460858  | 0.002771  |
| B | 1.437245  | -0.001370 | -0.896039 |
| B | -0.000005 | 0.882717  | 1.436880  |
| B | 1.437797  | -0.004509 | 0.895700  |
| B | 0.874139  | -1.402058 | -0.002375 |
| B | -0.874125 | -1.402068 | -0.002375 |
| B | -1.437797 | -0.004525 | 0.895700  |
| N | 0.000005  | -0.812116 | 1.277394  |
| H | -0.000007 | 1.316736  | -2.535540 |
| H | -2.356237 | -0.150194 | -1.623720 |
| H | -1.547765 | 2.454753  | 0.004748  |
| H | 1.547740  | 2.454769  | 0.004748  |
| H | 2.356239  | -0.150169 | -1.623720 |
| H | -0.000007 | 1.306767  | 2.540422  |
| H | 2.356561  | -0.156128 | 1.623068  |
| H | 1.339887  | -2.485208 | -0.004612 |
| H | -1.339859 | -2.485221 | -0.004612 |
| H | -2.356559 | -0.156153 | 1.623068  |

1,2-N<sub>2</sub>B<sub>10</sub>H<sub>10</sub>

|   |           |           |          |
|---|-----------|-----------|----------|
| B | 0.888287  | -0.002237 | 1.479456 |
| B | 1.449945  | 0.882436  | 0.026269 |
| B | 0.000547  | 1.462533  | 0.869214 |
| B | -0.890985 | -0.000648 | 1.478121 |
| B | -0.001804 | -1.464469 | 0.866269 |
| B | 1.448517  | -0.884989 | 0.024448 |

1,12-N<sub>2</sub>B<sub>10</sub>H<sub>10</sub>

|   |           |           |           |
|---|-----------|-----------|-----------|
| N | 0.000000  | -0.004428 | -1.488017 |
| B | -0.000125 | -1.511537 | -0.756403 |

|   |           |           |           |
|---|-----------|-----------|-----------|
| B | -1.440106 | -0.470018 | -0.755634 |
| B | -0.889523 | 1.220013  | -0.762906 |
| B | 0.889724  | 1.219867  | -0.762906 |
| B | 1.440029  | -0.470255 | -0.755635 |
| B | 0.000125  | 1.515478  | 0.753188  |
| B | 1.437553  | 0.469359  | 0.758532  |
| B | 0.888187  | -1.221257 | 0.761282  |
| B | -0.888388 | -1.221111 | 0.761282  |
| B | -1.437475 | 0.469596  | 0.758533  |
| N | 0.000000  | 0.004292  | 1.488652  |
| H | -2.354190 | -0.771072 | -1.441370 |
| H | -1.453483 | 1.999716  | -1.448973 |
| H | 1.453811  | 1.999477  | -1.448973 |
| H | 2.354062  | -0.771458 | -1.441371 |
| H | 0.000204  | 2.481282  | 1.434163  |
| H | 2.353487  | 0.770006  | 1.442068  |
| H | 1.453222  | -1.999541 | 1.448086  |
| H | -1.453549 | -1.999302 | 1.448086  |
| H | -2.353359 | 0.770393  | 1.442069  |
| H | -0.000204 | -2.479220 | -1.434890 |

1,7-P<sub>2</sub>B<sub>10</sub>H<sub>10</sub>

|   |           |           |           |
|---|-----------|-----------|-----------|
| B | -0.616876 | 1.763719  | 0.000000  |
| P | -1.961482 | 0.189371  | 0.000000  |
| B | -0.626122 | 0.678544  | 1.505249  |
| B | 0.886510  | 1.431286  | 0.904368  |
| B | 0.886510  | 1.431286  | -0.904368 |
| B | -0.626122 | 0.678544  | -1.505249 |
| B | 1.853950  | 0.233452  | 0.000000  |
| B | 0.886510  | -0.258284 | -1.505082 |
| B | -0.665879 | -1.075111 | -0.969394 |
| B | -0.665879 | -1.075111 | 0.969394  |
| B | 0.886510  | -0.258284 | 1.505082  |
| P | 1.043119  | -1.671882 | 0.000000  |
| H | -1.167726 | 0.990461  | 2.513210  |
| H | 1.415420  | 2.284890  | 1.534776  |
| H | 1.415420  | 2.284890  | -1.534776 |
| H | -1.167726 | 0.990461  | -2.513210 |
| H | 3.039932  | 0.213042  | 0.000000  |
| H | 1.406842  | -0.604138 | -2.513184 |
| H | -1.202790 | -1.942196 | -1.576158 |
| H | -1.202790 | -1.942196 | 1.576158  |
| H | 1.406842  | -0.604138 | 2.513184  |
| H | -1.163542 | 2.816385  | 0.000000  |

1,2-P<sub>2</sub>B<sub>10</sub>H<sub>10</sub>

|   |           |           |           |
|---|-----------|-----------|-----------|
| B | 1.816351  | -0.894315 | 0.000548  |
| B | 0.401037  | -1.479259 | -0.929241 |
| B | 1.254580  | 0.000742  | -1.461143 |
| B | 1.813775  | 0.898130  | -0.000103 |
| B | 1.254216  | 0.001704  | 1.461343  |
| B | 0.400005  | -1.478562 | 0.929950  |
| B | 0.396713  | 1.479839  | 0.929617  |
| B | -0.520368 | 0.000018  | 1.547310  |
| P | -1.396009 | -1.180793 | 0.000260  |
| B | -0.520180 | -0.002006 | -1.547234 |
| B | 0.396650  | 1.479040  | -0.930281 |
| P | -1.397987 | 1.178476  | -0.000540 |
| H | 1.852646  | 0.001858  | -2.485250 |
| H | 2.812186  | 1.537792  | -0.000737 |
| H | 1.852201  | 0.002664  | 2.485502  |
| H | 0.367082  | -2.481568 | 1.563850  |
| H | 0.361734  | 2.483840  | 1.561832  |
| H | -1.173215 | -0.001134 | 2.537220  |
| H | -1.172359 | -0.002588 | -2.537593 |
| H | 0.362072  | 2.482169  | -1.563900 |
| H | 0.367469  | -2.483269 | -1.561656 |
| H | 2.816231  | -1.531661 | 0.001093  |

1,12-P<sub>2</sub>B<sub>10</sub>H<sub>10</sub>

|   |           |           |           |
|---|-----------|-----------|-----------|
| P | -2.061710 | -0.000060 | -0.000727 |
| B | -0.741162 | -0.141519 | -1.576295 |
| B | -0.740432 | -1.544987 | -0.352626 |
| B | -0.740856 | -0.812626 | 1.360041  |
| B | -0.740851 | 1.041889  | 1.193552  |
| B | -0.740418 | 1.457471  | -0.622168 |
| B | 0.740702  | 0.141532  | 1.576443  |
| B | 0.740473  | 1.544698  | 0.352865  |
| B | 0.740321  | 0.812481  | -1.359502 |
| B | 0.740317  | -1.041651 | -1.193046 |
| B | 0.740458  | -1.457145 | 0.622352  |
| P | 2.062487  | -0.000025 | -0.000230 |
| H | -1.276967 | -2.575674 | -0.588852 |
| H | -1.275512 | -1.353924 | 2.269517  |
| H | -1.275506 | 1.736531  | 1.992066  |
| H | -1.276946 | 2.429600  | -1.038208 |
| H | 1.273383  | 0.236256  | 2.631560  |
| H | 1.275420  | 2.575790  | 0.591035  |
| H | 1.275594  | 1.353233  | -2.268856 |
| H | 1.275588  | -1.735734 | -1.991538 |
| H | 1.275399  | -2.429325 | 1.040377  |
| H | -1.274867 | -0.236190 | -2.630824 |

1,2-As<sub>2</sub>B<sub>10</sub>H<sub>10</sub>

|    |           |           |           |
|----|-----------|-----------|-----------|
| B  | -2.262345 | 0.895395  | -0.000538 |
| B  | -0.857972 | 1.482662  | -0.942533 |
| B  | -1.707530 | -0.002025 | -1.462666 |
| B  | -2.262785 | -0.898501 | 0.001027  |
| B  | -1.707330 | -0.000136 | 1.463058  |
| B  | -0.858203 | 1.483928  | 0.939855  |
| B  | -0.856264 | -1.483630 | 0.941153  |
| B  | 0.060599  | 0.001552  | 1.585911  |
| As | 1.051595  | 1.268214  | -0.000243 |
| B  | 0.060401  | -0.002285 | -1.585714 |
| B  | -0.857104 | -1.485334 | -0.939340 |
| As | 1.054049  | -1.266720 | 0.000189  |
| H  | -2.315998 | -0.002124 | -2.481285 |
| H  | -3.264454 | -1.533488 | 0.001768  |
| H  | -2.315490 | 0.000469  | 2.481851  |
| H  | -0.862237 | 2.490214  | 1.571160  |
| H  | -0.859565 | -2.488474 | 1.574763  |
| H  | 0.681358  | 0.002779  | 2.597322  |
| H  | 0.681398  | -0.000823 | -2.596991 |
| H  | -0.859727 | -2.491439 | -1.570957 |
| H  | -0.863635 | 2.486895  | -1.575820 |
| H  | -3.265237 | 1.528571  | -0.001096 |

1,12-As<sub>2</sub>B<sub>10</sub>H<sub>10</sub>

|    |           |           |           |
|----|-----------|-----------|-----------|
| As | -2.185998 | 0.000077  | -0.000036 |
| B  | -0.734977 | -0.933118 | -1.300180 |
| B  | -0.734869 | -1.525382 | 0.484841  |
| B  | -0.734618 | -0.010341 | 1.599952  |
| B  | -0.734642 | 1.519121  | 0.503990  |
| B  | -0.734579 | 0.949092  | -1.288379 |
| B  | 0.734765  | 0.932990  | 1.299969  |
| B  | 0.734821  | 1.525259  | -0.484698 |
| B  | 0.734622  | 0.010305  | -1.599641 |
| B  | 0.734572  | -1.518929 | -0.503895 |
| B  | 0.734584  | -0.949009 | 1.288268  |
| As | 2.186051  | -0.000077 | -0.000009 |
| H  | -1.250064 | -2.544242 | 0.808859  |
| H  | -1.249694 | -0.017155 | 2.669147  |
| H  | -1.250106 | 2.533655  | 0.841042  |
| H  | -1.249559 | 1.582893  | -2.149574 |
| H  | 1.249250  | 1.555574  | 2.169562  |
| H  | 1.250027  | 2.544121  | -0.808704 |
| H  | 1.250104  | -2.533400 | -0.841084 |
| H  | 1.249510  | -1.582657 | 2.149614  |
| H  | -1.249291 | -1.555641 | -2.169641 |
| H  | 1.249673  | 0.016909  | -2.668872 |

1,7-As<sub>2</sub>B<sub>10</sub>H<sub>10</sub>

|    |           |           |           |
|----|-----------|-----------|-----------|
| B  | 1.455288  | 1.468703  | -0.000027 |
| As | 1.876634  | -0.657388 | -0.000020 |
| B  | 0.887495  | 0.535432  | -1.519061 |
| B  | -0.000022 | 1.964589  | -0.904469 |
| B  | -0.000022 | 1.964555  | 0.904440  |
| B  | 0.887550  | 0.535442  | 1.519044  |
| B  | -1.455290 | 1.468373  | -0.000028 |
| B  | -0.887425 | 0.535464  | 1.519101  |
| B  | 0.000011  | -0.993826 | 0.996791  |
| B  | 0.000015  | -0.993949 | -0.996411 |
| B  | -0.887369 | 0.535454  | -1.519118 |
| As | -1.876660 | -0.657342 | -0.000021 |
| H  | 1.495988  | 0.536018  | -2.538330 |
| H  | -0.000168 | 2.972049  | -1.530718 |
| H  | -0.000169 | 2.971979  | 1.530746  |
| H  | 1.495924  | 0.536156  | 2.538382  |
| H  | -2.459204 | 2.101704  | 0.000087  |
| H  | -1.495868 | 0.536161  | 2.538397  |
| H  | 0.000110  | -2.003714 | -1.623030 |
| H  | -1.495931 | 0.536021  | -2.538345 |
| H  | 2.458905  | 2.102511  | 0.000089  |
| H  | 0.000101  | -2.003992 | 1.622766  |

1,2-Sb<sub>2</sub>B<sub>10</sub>H<sub>10</sub>

|    |           |           |           |
|----|-----------|-----------|-----------|
| B  | 0.901900  | 2.609735  | -0.000319 |
| B  | 1.483208  | 1.214837  | 0.954720  |
| B  | 1.482866  | 1.215258  | -0.956235 |
| B  | 0.001268  | 2.072080  | -1.464120 |
| B  | -0.897451 | 2.609363  | 0.000331  |
| B  | 0.001851  | 2.072356  | 1.463982  |
| B  | -1.480059 | 1.216163  | -0.955600 |
| B  | -1.479410 | 1.215809  | 0.956485  |
| B  | 0.002977  | 0.316774  | 1.648384  |
| Sb | 1.425645  | -0.898890 | -0.000068 |
| B  | 0.001007  | 0.316212  | -1.647639 |
| Sb | -1.427758 | -0.895470 | 0.000060  |
| H  | 2.493980  | 1.277025  | -1.580340 |
| H  | 0.000764  | 2.695478  | -2.474740 |
| H  | -1.529780 | 3.613385  | 0.000462  |
| H  | 0.002878  | 2.695578  | 2.474712  |
| H  | -2.491315 | 1.278199  | -1.579554 |
| H  | -2.490266 | 1.278391  | 1.581048  |
| H  | -0.000715 | -0.254565 | -2.690023 |
| H  | 2.494453  | 1.275882  | 1.578520  |
| H  | 0.002036  | -0.253104 | 2.691232  |
| H  | 1.534972  | 3.613199  | -0.000829 |

1,7-Sb<sub>2</sub>B<sub>10</sub>H<sub>10</sub>

|    |           |           |           |
|----|-----------|-----------|-----------|
| B  | 1.457922  | 1.700595  | -0.000033 |
| Sb | 2.080349  | -0.558817 | -0.000006 |
| B  | 0.885748  | 0.761362  | -1.533628 |
| B  | -0.000137 | 2.185181  | -0.906408 |
| B  | -0.000137 | 2.185210  | 0.906305  |
| B  | 0.885737  | 0.761447  | 1.533660  |
| B  | -1.458094 | 1.700321  | -0.000033 |
| B  | -0.885717 | 0.761263  | 1.533745  |
| B  | 0.000099  | -0.786810 | 1.027810  |
| B  | 0.000101  | -0.786783 | -1.027584 |
| B  | -0.885727 | 0.761176  | -1.533713 |
| Sb | -2.080326 | -0.558845 | -0.000007 |
| H  | 1.463929  | 0.794560  | -2.572529 |
| H  | -0.000150 | 3.197343  | -1.526656 |
| H  | -0.000150 | 3.197429  | 1.526462  |
| H  | 1.463961  | 0.794899  | 2.572528  |
| H  | -2.431459 | 2.383266  | -0.000032 |
| H  | -1.464035 | 0.794643  | 2.572560  |
| H  | 0.000144  | -1.776910 | -1.691843 |
| H  | -1.464000 | 0.794303  | -2.572561 |
| H  | 0.000148  | -1.776866 | 1.692150  |
| H  | 2.431447  | 2.383291  | -0.000030 |

1,2-Bi<sub>2</sub>B<sub>10</sub>H<sub>10</sub>

|    |           |           |           |
|----|-----------|-----------|-----------|
| B  | 0.898625  | 2.908925  | -0.001517 |
| B  | 1.477937  | 1.520238  | 0.958657  |
| B  | 1.476181  | 1.519948  | -0.961899 |
| B  | -0.003146 | 2.379731  | -1.465470 |
| B  | -0.903140 | 2.908061  | 0.000476  |
| B  | -0.000046 | 2.380695  | 1.464676  |
| B  | -1.479883 | 1.516683  | -0.958444 |
| B  | -1.477952 | 1.517037  | 0.961383  |
| B  | 0.002061  | 0.629532  | 1.665879  |
| Bi | 1.474724  | -0.661330 | -0.000067 |
| B  | -0.001771 | 0.628021  | -1.664634 |
| Bi | -1.473888 | -0.662521 | 0.000140  |
| H  | 2.490663  | 1.590974  | -1.581158 |
| H  | -0.004897 | 3.005136  | -2.475624 |
| H  | -1.538866 | 3.910580  | 0.000862  |
| H  | -0.000140 | 3.006906  | 2.474341  |
| H  | -2.495520 | 1.587198  | -1.575972 |
| H  | -2.492348 | 1.588209  | 1.580818  |
| H  | -0.002253 | 0.069738  | -2.714601 |
| H  | 2.493423  | 1.593010  | 1.576004  |
| H  | 0.003533  | 0.070993  | 2.715673  |
| H  | 1.532746  | 3.912526  | -0.001890 |

1,12-Sb<sub>2</sub>B<sub>10</sub>H<sub>10</sub>

|    |           |           |           |
|----|-----------|-----------|-----------|
| Sb | 2.417721  | -0.000118 | -0.000126 |
| B  | 0.728177  | -0.321938 | -1.582919 |
| B  | 0.728591  | 1.408041  | -0.795677 |
| B  | 0.728331  | 1.194061  | 1.092092  |
| B  | 0.728409  | -0.670890 | 1.471282  |
| B  | 0.728726  | -1.607636 | -0.182733 |
| B  | -0.728433 | 0.322434  | 1.584248  |
| B  | -0.728296 | -1.408497 | 0.796778  |
| B  | -0.728511 | -1.194703 | -1.092345 |
| B  | -0.728143 | 0.672538  | -1.471983 |
| B  | -0.728837 | 1.608826  | 0.182927  |
| Sb | -2.417725 | -0.000143 | -0.000087 |
| H  | 1.205807  | 2.354637  | -1.334426 |
| H  | 1.203293  | 1.997644  | 1.828691  |
| H  | 1.203442  | -1.120162 | 2.464545  |
| H  | 1.206496  | -2.689624 | -0.305886 |
| H  | -1.203490 | 0.541001  | 2.652199  |
| H  | -1.205160 | -2.355105 | 1.335697  |
| H  | -1.203836 | 1.120708  | -2.465355 |
| H  | -1.206105 | 2.690906  | 0.306688  |
| H  | 1.203548  | -0.540224 | -2.650300 |
| H  | -1.203886 | -1.997632 | -1.829317 |

1,7-Bi<sub>2</sub>B<sub>10</sub>H<sub>10</sub>

|    |           |           |           |
|----|-----------|-----------|-----------|
| B  | -1.456609 | 1.890144  | 0.000000  |
| Bi | -2.153378 | -0.411368 | 0.000000  |
| B  | -0.884720 | 0.949507  | 1.534875  |
| B  | 0.000058  | 2.371505  | 0.907249  |
| B  | 0.000058  | 2.371505  | -0.907248 |
| B  | -0.884720 | 0.949508  | -1.534875 |
| B  | 1.456723  | 1.890054  | 0.000000  |
| B  | 0.884718  | 0.949427  | -1.534836 |
| B  | -0.000077 | -0.602756 | -1.021532 |
| B  | -0.000077 | -0.602756 | 1.021532  |
| B  | 0.884718  | 0.949427  | 1.534836  |
| Bi | 2.153370  | -0.411381 | 0.000000  |
| H  | -1.454253 | 0.988263  | 2.579484  |
| H  | 0.000121  | 3.385312  | 1.526218  |
| H  | 0.000121  | 3.385312  | -1.526218 |
| H  | -1.454253 | 0.988264  | -2.579484 |
| H  | 2.424799  | 2.582233  | 0.000000  |
| H  | 1.454221  | 0.988161  | -2.579466 |
| H  | 1.454221  | 0.988161  | 2.579466  |
| H  | -0.000012 | -1.588839 | -1.694909 |
| H  | -2.424657 | 2.582372  | 0.000000  |
| H  | -0.000012 | -1.588839 | 1.694909  |



|   |           |           |           |
|---|-----------|-----------|-----------|
| H | -1.541129 | 0.827704  | -2.478833 |
| H | 0.955398  | -1.006243 | 2.430049  |
| H | 0.989904  | 2.138066  | 1.619909  |
| H | -1.485742 | 2.635108  | 0.010258  |
| H | 0.736581  | -2.445739 | -0.009180 |

1,12-Bi<sub>2</sub>B<sub>10</sub>H<sub>10</sub>

|    |           |           |           |
|----|-----------|-----------|-----------|
| Bi | 2.497081  | -0.000345 | -0.000242 |
| B  | 0.725073  | -1.436507 | -0.749726 |
| B  | 0.726037  | 0.270087  | -1.597458 |
| B  | 0.726647  | 1.604394  | -0.236525 |
| B  | 0.726944  | 0.722142  | 1.451773  |
| B  | 0.726446  | -1.157387 | 1.134448  |
| B  | -0.725528 | 1.437480  | 0.750169  |
| B  | -0.725534 | -0.268229 | 1.598343  |
| B  | -0.727057 | -1.602867 | 0.238037  |
| B  | -0.727184 | -0.720018 | -1.451475 |
| B  | -0.726047 | 1.159069  | -1.133404 |
| Bi | -2.497055 | -0.000229 | -0.000051 |
| H  | 1.195910  | 0.451411  | -2.675951 |
| H  | 1.196868  | 2.685909  | -0.397835 |
| H  | 1.197706  | 1.208259  | 2.430923  |
| H  | 1.196592  | -1.938390 | 1.899589  |
| H  | -1.195621 | 2.406928  | 1.255902  |
| H  | -1.196032 | -0.450225 | 2.676440  |
| H  | -1.196909 | 1.939368  | -1.898813 |
| H  | 1.195442  | -2.405245 | -1.255219 |
| H  | -1.197246 | -2.684493 | 0.398745  |
| H  | -1.197858 | -1.206695 | -2.430410 |

1,7-AlCB<sub>10</sub>H<sub>12</sub>

|    |           |           |           |
|----|-----------|-----------|-----------|
| B  | 0.504456  | 1.503786  | 0.486517  |
| B  | 0.508724  | -0.003397 | 1.577834  |
| Al | 1.992472  | 0.000274  | 0.010707  |
| B  | 0.491067  | 0.924472  | -1.263591 |
| B  | -1.008620 | 1.453832  | -0.442901 |
| B  | -1.004773 | 0.901712  | 1.258066  |
| C  | -0.939327 | 0.002972  | -1.359092 |
| B  | -1.937305 | 0.000349  | 0.029643  |
| B  | -1.004876 | -0.907483 | 1.253788  |
| B  | 0.503894  | -1.505794 | 0.480389  |
| B  | 0.490679  | -0.919247 | -1.267309 |
| B  | -1.009311 | -1.452020 | -0.449050 |
| H  | 3.582273  | -0.004126 | -0.070723 |
| H  | 0.793474  | 1.539930  | -2.244559 |
| H  | -1.603368 | 2.384901  | -0.890019 |
| H  | -1.568185 | 1.528892  | 2.103175  |
| H  | -3.119656 | 0.001678  | -0.114424 |
| H  | -1.567879 | -1.538436 | 2.096382  |
| H  | 0.793259  | -1.530541 | -2.250830 |
| H  | 0.929987  | 2.579010  | 0.802615  |
| H  | -1.604577 | -2.380263 | -0.901325 |
| H  | 0.930310  | -2.581980 | 0.791905  |
| H  | 0.950171  | -0.005724 | 2.693210  |
| H  | -1.451666 | 0.004215  | -2.316986 |

1,2-AlCB<sub>10</sub>H<sub>12</sub>

|    |           |           |           |
|----|-----------|-----------|-----------|
| B  | -1.010245 | 0.504688  | -1.459493 |
| B  | -0.972819 | 1.556338  | 0.005803  |
| B  | 0.528481  | 1.269832  | -0.933950 |
| B  | 0.475106  | -0.483817 | -1.462330 |
| B  | -1.063523 | -1.194659 | -0.901770 |
| B  | -1.965585 | 0.056536  | 0.000002  |
| C  | 0.380038  | -1.415293 | -0.005495 |
| B  | -1.063974 | -1.201636 | 0.892429  |
| B  | -1.010769 | 0.493388  | 1.463161  |
| B  | 0.528204  | 1.262067  | 0.943711  |
| Al | 1.980899  | 0.004820  | 0.000415  |
| B  | 0.474759  | -0.495086 | 1.458700  |
| H  | 0.990339  | 2.151533  | -1.602537 |
| H  | 0.955064  | -0.987279 | -2.437991 |
| H  | -1.530855 | -2.121653 | -1.488092 |
| H  | -3.158435 | 0.071747  | -0.000134 |
| H  | -1.531059 | -2.133411 | 1.471309  |
| H  | -1.541413 | 0.809053  | 2.484915  |
| H  | 3.531262  | -0.348037 | -0.003398 |

1,12-AlCB<sub>10</sub>H<sub>12</sub>

|    |           |           |           |
|----|-----------|-----------|-----------|
| B  | -0.504931 | 1.303288  | -0.903562 |
| Al | -1.989099 | -0.000274 | -0.001609 |
| B  | -0.506981 | 1.262780  | 0.959143  |
| B  | 0.992384  | 1.526015  | 0.033700  |
| B  | 0.995173  | 0.503040  | -1.438928 |
| B  | -0.503235 | -0.456501 | -1.518084 |
| C  | 1.767758  | -0.000340 | 0.002714  |
| B  | 0.995170  | -1.212375 | -0.921118 |
| B  | -0.505869 | -1.585471 | -0.036456 |
| B  | -0.508184 | -0.523573 | 1.495208  |
| B  | 0.990776  | 0.438899  | 1.460088  |
| B  | 0.989882  | -1.255064 | 0.870490  |
| H  | -0.912224 | 2.159464  | 1.643476  |
| H  | 1.671961  | 2.505570  | 0.057027  |
| H  | 1.675750  | 0.823703  | -2.363893 |

|   |           |           |           |   |           |           |           |
|---|-----------|-----------|-----------|---|-----------|-----------|-----------|
| H | -0.905623 | -0.783431 | -2.598722 | B | -1.370357 | -1.453141 | -0.443553 |
| H | 1.672918  | -1.994808 | -1.512968 | H | 3.191023  | -0.007099 | -0.080828 |
| H | -0.910661 | -2.713294 | -0.063250 | H | 0.422781  | 1.536689  | -2.258205 |
| H | 1.666997  | 0.719744  | 2.401253  | H | -1.967120 | 2.380987  | -0.892716 |
| H | -0.909548 | 2.229674  | -1.547524 | H | -1.922194 | 1.533994  | 2.101315  |
| H | 1.674453  | -2.056609 | 1.427850  | H | -3.479055 | 0.002010  | -0.106305 |
| H | -0.913866 | -0.891109 | 2.561506  | H | -1.922963 | -1.530842 | 2.103398  |
| H | -3.582770 | -0.000651 | -0.005203 | H | 0.421840  | -1.539498 | -2.256338 |
| H | 2.853422  | 0.002162  | 0.002676  | H | 0.567042  | 2.589599  | 0.795005  |
|   |           |           |           | H | -1.969009 | -2.381471 | -0.890826 |
|   |           |           |           | H | 0.566285  | -2.588707 | 0.797183  |
|   |           |           |           | H | 0.592627  | 0.001615  | 2.698690  |
|   |           |           |           | H | -1.816785 | -0.001471 | -2.314001 |

1,2-GaCB<sub>10</sub>H<sub>12</sub>

|    |           |           |           |
|----|-----------|-----------|-----------|
| B  | 1.359934  | 0.509200  | 1.462330  |
| B  | 1.298673  | 1.571146  | 0.002625  |
| B  | -0.188500 | 1.256721  | 0.950850  |
| B  | -0.101021 | -0.513566 | 1.460489  |
| B  | 1.455807  | -1.182541 | 0.893082  |
| B  | 2.326219  | 0.097393  | 0.000037  |
| C  | 0.022554  | -1.434652 | -0.002354 |
| B  | 1.455607  | -1.179598 | -0.896996 |
| B  | 1.359635  | 0.514079  | -1.460649 |
| B  | -0.188653 | 1.260204  | -0.946564 |
| Ga | -1.631460 | -0.004016 | -0.000049 |
| B  | -0.101272 | -0.508699 | -1.462169 |
| H  | -0.662456 | 2.125056  | 1.625753  |
| H  | -0.561976 | -1.030981 | 2.436426  |
| H  | 1.944616  | -2.099019 | 1.478285  |
| H  | 3.518107  | 0.145130  | -0.000084 |
| H  | 1.944370  | -2.093993 | -1.485484 |
| H  | 1.882781  | 0.849509  | -2.479808 |
| H  | -3.137542 | -0.424791 | 0.001071  |
| H  | 1.883090  | 0.841362  | 2.482546  |
| H  | -0.561868 | -1.023036 | -2.439907 |
| H  | -0.662572 | 2.130750  | -1.618607 |
| H  | 1.788020  | 2.660579  | 0.004403  |
| H  | -0.316781 | -2.469859 | -0.004108 |

1,12-GaCB<sub>10</sub>H<sub>12</sub>

|    |           |           |           |
|----|-----------|-----------|-----------|
| B  | -0.144393 | 1.490614  | -0.564775 |
| Ga | -1.625085 | -0.000227 | 0.000064  |
| B  | -0.143836 | 0.998309  | 1.242503  |
| B  | 1.350726  | 1.472566  | 0.400646  |
| B  | 1.350721  | 0.836709  | -1.275803 |
| B  | -0.143383 | -0.076461 | -1.591644 |
| C  | 2.125138  | -0.000399 | 0.000601  |
| B  | 1.352239  | -0.953957 | -1.188473 |
| B  | -0.143709 | -1.537785 | -0.419813 |
| B  | -0.144190 | -0.874014 | 1.332835  |
| B  | 1.351397  | 0.073707  | 1.522338  |
| B  | 1.350147  | -1.428003 | 0.541293  |
| H  | -0.546407 | 1.702426  | 2.123175  |
| H  | 2.031742  | 2.416380  | 0.659415  |
| H  | 2.031624  | 1.371390  | -2.095579 |
| H  | -0.544802 | -0.132784 | -2.718212 |
| H  | 2.030648  | -1.569462 | -1.951656 |
| H  | -0.546507 | -2.625341 | -0.717221 |
| H  | 2.029423  | 0.118145  | 2.502048  |
| H  | -0.547717 | 2.544531  | -0.964824 |
| H  | 2.038257  | -2.338476 | 0.886203  |
| H  | -0.546434 | -1.488356 | 2.278499  |
| H  | -3.192309 | -0.001115 | -0.002378 |
| H  | 3.210678  | 0.003680  | -0.000610 |

1,7-GaCB<sub>10</sub>H<sub>12</sub>

|    |           |           |           |
|----|-----------|-----------|-----------|
| B  | 0.142972  | 1.514114  | 0.483614  |
| B  | 0.150795  | 0.000409  | 1.584938  |
| Ga | 1.628699  | 0.000073  | 0.003399  |
| B  | 0.124134  | 0.927007  | -1.273870 |
| B  | -1.368864 | 1.452574  | -0.445033 |
| B  | -1.359825 | 0.905106  | 1.257019  |
| C  | -1.301369 | -0.000476 | -1.357287 |
| B  | -2.296439 | 0.000627  | 0.034711  |
| B  | -1.360385 | -0.903719 | 1.257914  |
| B  | 0.141568  | -1.513567 | 0.485480  |
| B  | 0.123217  | -0.928454 | -1.272823 |

1,2-InCB<sub>10</sub>H<sub>12</sub>

|   |           |           |           |
|---|-----------|-----------|-----------|
| B | -1.702175 | 0.534828  | -1.456668 |
| B | -1.618998 | 1.582764  | 0.019053  |
| B | -0.147884 | 1.261985  | -0.944970 |
| B | -0.260333 | -0.514230 | -1.457980 |
| B | -1.835863 | -1.159808 | -0.907197 |
| B | -2.676749 | 0.130078  | 0.001463  |

|    |           |           |           |   |           |           |           |
|----|-----------|-----------|-----------|---|-----------|-----------|-----------|
| C  | -0.407923 | -1.445874 | -0.016982 | B | 0.204668  | 0.606381  | 1.486829  |
| B  | -1.836773 | -1.180154 | 0.880237  | B | 1.693244  | 1.297119  | 0.806213  |
| B  | -1.702212 | 0.500266  | 1.468653  | B | 1.694285  | 1.166968  | -0.983997 |
| B  | -0.147096 | 1.236355  | 0.974355  | B | 0.206199  | 0.385032  | -1.559103 |
| In | 1.519942  | -0.002109 | -0.000119 | C | 2.464856  | 0.000227  | 0.000995  |
| B  | -0.260698 | -0.548695 | 1.444721  | B | 1.694562  | -0.575603 | -1.411650 |
| H  | 0.307425  | 2.143107  | -1.618089 | B | 0.204367  | -1.364329 | -0.847535 |
| H  | 0.169519  | -1.033399 | -2.449527 | B | 0.203039  | -1.227942 | 1.034340  |
| H  | -2.345667 | -2.054543 | -1.508918 | B | 1.692006  | -0.366397 | 1.481105  |
| H  | -3.867075 | 0.210737  | 0.002152  | B | 1.692670  | -1.523448 | 0.110611  |
| H  | -2.346236 | -2.089046 | 1.460664  | H | -0.168755 | 1.034841  | 2.541939  |
| H  | -2.218432 | 0.835776  | 2.491838  | H | 2.384949  | 2.121694  | 1.320316  |
| H  | 3.145295  | -0.542831 | -0.002174 | H | 2.386472  | 1.908503  | -1.611326 |
| H  | -2.219790 | 0.892931  | -2.471467 | H | -0.165562 | 0.657572  | -2.665378 |
| H  | 0.170086  | -1.091978 | 2.422886  | H | 2.382839  | -0.940240 | -2.314935 |
| H  | 0.307597  | 2.101319  | 1.668732  | H | -0.170897 | -2.328567 | -1.452309 |
| H  | -2.088705 | 2.681276  | 0.032457  | H | 2.379067  | -0.598147 | 2.428201  |
| H  | -0.099737 | -2.491714 | -0.029147 | H | -0.167269 | 2.738412  | -0.199435 |
|    |           |           |           | H | 2.382472  | -2.493872 | 0.181278  |
|    |           |           |           | H | -0.172824 | -2.094834 | 1.771583  |
|    |           |           |           | H | -3.216441 | 0.006486  | -0.001904 |
|    |           |           |           | H | 3.550319  | -0.011222 | 0.002338  |

1,7-InCB<sub>10</sub>H<sub>12</sub>

|    |           |           |           |
|----|-----------|-----------|-----------|
| B  | -0.203857 | 1.529970  | 0.459726  |
| B  | -0.189083 | 0.020682  | 1.590659  |
| In | 1.507181  | 0.000005  | 0.002283  |
| B  | -0.233882 | 0.914033  | -1.296982 |
| B  | -1.717522 | 1.447751  | -0.459801 |
| B  | -1.695509 | 0.922473  | 1.249788  |
| C  | -1.654759 | -0.017439 | -1.354039 |
| B  | -2.640095 | 0.001021  | 0.044953  |
| B  | -1.695859 | -0.889102 | 1.273172  |
| B  | -0.204327 | -1.517512 | 0.498929  |
| B  | -0.234527 | -0.948422 | -1.272038 |
| B  | -1.718092 | -1.459147 | -0.421609 |
| H  | 3.213896  | -0.001797 | -0.134138 |
| H  | 0.035826  | 1.516080  | -2.296079 |
| H  | -2.323211 | 2.368763  | -0.913604 |
| H  | -2.255781 | 1.560180  | 2.089451  |
| H  | -3.823854 | -0.000782 | -0.086416 |
| H  | -2.256125 | -1.504448 | 2.129400  |
| H  | 0.035399  | -1.576863 | -2.254703 |
| H  | 0.195216  | 2.619840  | 0.759102  |
| H  | -2.324375 | -2.391429 | -0.850932 |
| H  | 0.194602  | -2.599244 | 0.826865  |
| H  | 0.228877  | 0.035172  | 2.714418  |
| H  | -2.180011 | -0.029837 | -2.304964 |

1,2-TlCB<sub>10</sub>H<sub>12</sub>

|    |           |           |           |
|----|-----------|-----------|-----------|
| B  | 2.126142  | 0.505991  | 1.487750  |
| B  | 1.916883  | 1.620628  | 0.047128  |
| B  | 0.515147  | 1.143305  | 1.040456  |
| B  | 0.771350  | -0.648414 | 1.415060  |
| B  | 2.409045  | -1.127924 | 0.859591  |
| B  | 3.121911  | 0.280180  | 0.011537  |
| C  | 0.997314  | -1.463600 | -0.043219 |
| B  | 2.412193  | -1.076216 | -0.920633 |
| B  | 2.133171  | 0.591273  | -1.453623 |
| B  | 0.520639  | 1.201366  | -0.977398 |
| Tl | -1.308553 | -0.004466 | -0.000063 |
| B  | 0.776441  | -0.563205 | -1.452435 |
| H  | 0.021076  | 1.980831  | 1.739016  |
| H  | 0.372727  | -1.242743 | 2.378029  |
| H  | 2.999470  | -1.997347 | 1.424547  |
| H  | 4.293050  | 0.508340  | 0.021381  |
| H  | 3.003783  | -1.912670 | -1.532193 |
| H  | 2.611957  | 1.040254  | -2.451213 |
| H  | -2.835571 | -0.975455 | -0.046350 |
| H  | 2.600151  | 0.896716  | 2.511766  |
| H  | 0.380530  | -1.102113 | -2.448587 |
| H  | 0.025022  | 2.077201  | -1.626122 |
| H  | 2.276849  | 2.759744  | 0.082144  |
| H  | 0.745240  | -2.524312 | -0.075198 |

1,12-InCB<sub>10</sub>H<sub>12</sub>

|    |           |           |           |
|----|-----------|-----------|-----------|
| B  | 0.205861  | 1.602560  | -0.116318 |
| In | -1.503021 | -0.000075 | -0.000180 |

1,7-TlCB<sub>10</sub>H<sub>12</sub>

|    |           |           |           |
|----|-----------|-----------|-----------|
| B  | -0.610006 | 1.541736  | 0.443690  |
| B  | -0.534292 | -0.030229 | 1.578230  |
| Tl | 1.266215  | -0.000035 | 0.002364  |
| B  | -0.721219 | 0.940757  | -1.302402 |
| B  | -2.169524 | 1.455999  | -0.392279 |
| B  | -2.035229 | 0.893688  | 1.301838  |
| C  | -2.159333 | 0.023957  | -1.319159 |
| B  | -3.055183 | -0.000389 | 0.141424  |
| B  | -2.038478 | -0.938801 | 1.268626  |
| B  | -0.613032 | -1.556027 | 0.389480  |
| B  | -0.722736 | -0.896206 | -1.333593 |
| B  | -2.172609 | -1.439766 | -0.443303 |
| H  | 2.946553  | 0.002309  | -0.600514 |
| H  | -0.498411 | 1.570686  | -2.296989 |
| H  | -2.801543 | 2.393421  | -0.770660 |
| H  | -2.539668 | 1.493207  | 2.202813  |
| H  | -4.245592 | 0.002371  | 0.104235  |
| H  | -2.544422 | -1.568804 | 2.147699  |
| H  | -0.501348 | -1.490936 | -2.349964 |
| H  | -0.209645 | 2.624253  | 0.763240  |
| H  | -2.806633 | -2.361599 | -0.855258 |
| H  | -0.214358 | -2.650260 | 0.669049  |
| H  | -0.094797 | -0.050612 | 2.691318  |
| H  | -2.735983 | 0.041257  | -2.240044 |

1,2-SiCB<sub>10</sub>H<sub>12</sub>

|    |           |           |           |
|----|-----------|-----------|-----------|
| B  | -0.951016 | 1.564906  | 0.000560  |
| B  | 0.543655  | 1.289795  | 0.956711  |
| B  | 0.543656  | 1.290480  | -0.955787 |
| B  | -0.988812 | 0.505211  | -1.467291 |
| B  | -1.936960 | 0.066682  | 0.000024  |
| B  | -0.988812 | 0.504160  | 1.467653  |
| B  | -1.047995 | -1.198986 | -0.898992 |
| B  | -1.047994 | -1.199630 | 0.898133  |
| B  | 0.478867  | -0.499094 | 1.507330  |
| Si | 1.759918  | -0.006695 | -0.000002 |
| B  | 0.478867  | -0.498014 | -1.507687 |
| C  | 0.384421  | -1.441460 | -0.000516 |
| H  | 0.789134  | -2.451562 | -0.000878 |
| H  | -1.437434 | 2.646797  | 0.000948  |
| H  | 1.090664  | 2.125353  | -1.600199 |
| H  | -1.501102 | 0.831092  | -2.485904 |
| H  | -3.122411 | 0.088922  | 0.000031  |
| H  | -1.501102 | 0.829311  | 2.486498  |
| H  | -1.495189 | -2.126544 | -1.484487 |
| H  | -1.495188 | -2.127606 | 1.482964  |
| H  | 1.016912  | -0.990468 | 2.445131  |
| H  | 3.185478  | -0.345838 | -0.000124 |
| H  | 1.016913  | -0.988717 | -2.445839 |
| H  | 1.090663  | 2.124207  | 1.601721  |

1,12-TlCB<sub>10</sub>H<sub>12</sub>

|    |           |           |           |
|----|-----------|-----------|-----------|
| B  | 0.617100  | -0.542950 | -1.524283 |
| Tl | -1.248907 | 0.000029  | -0.000011 |
| B  | 0.616347  | 1.281147  | -0.988114 |
| B  | 2.098753  | 0.431358  | -1.464506 |
| B  | 2.099235  | -1.259572 | -0.862559 |
| B  | 0.616797  | -1.617595 | 0.043807  |
| C  | 2.868657  | 0.000853  | 0.001540  |
| B  | 2.097963  | -1.209593 | 0.931943  |
| B  | 0.615334  | -0.457851 | 1.551568  |
| B  | 0.614724  | 1.335022  | 0.913594  |
| B  | 2.097307  | 1.526436  | -0.042055 |
| B  | 2.096237  | 0.512754  | 1.439683  |
| H  | 0.250213  | 2.184940  | -1.683932 |
| H  | 2.787526  | 0.708385  | -2.398359 |
| H  | 2.788352  | -2.063654 | -1.411798 |
| H  | 0.251658  | -2.758078 | 0.075338  |
| H  | 2.784677  | -1.981628 | 1.528203  |
| H  | 0.248600  | -0.781165 | 2.645187  |
| H  | 2.783481  | 2.502001  | -0.067769 |
| H  | 0.251029  | -0.925682 | -2.598815 |
| H  | 2.784767  | 0.839647  | 2.357452  |
| H  | 0.247938  | 2.276988  | 1.556349  |
| H  | -3.031997 | -0.005006 | -0.003543 |
| H  | 3.954328  | 0.000000  | -0.002053 |

1,7-SiCB<sub>10</sub>H<sub>12</sub>

|    |           |           |           |
|----|-----------|-----------|-----------|
| B  | -1.666355 | 0.270024  | 0.000000  |
| Si | -0.811310 | -1.577264 | 0.000000  |
| B  | -0.673314 | -0.232460 | 1.530421  |
| B  | -0.673314 | 1.451448  | 0.906818  |
| B  | -0.673314 | 1.451448  | -0.906818 |
| B  | -0.673314 | -0.232460 | -1.530421 |
| B  | 0.843904  | 1.720978  | 0.000000  |
| B  | 0.852431  | 0.681941  | -1.457488 |
| B  | 0.916061  | -1.023644 | -0.942480 |
| B  | 0.916061  | -1.023644 | 0.942480  |
| B  | 0.852431  | 0.681941  | 1.457488  |
| C  | 1.630399  | 0.194541  | 0.000000  |
| H  | 2.716344  | 0.208070  | 0.000000  |
| H  | -2.854366 | 0.289441  | 0.000000  |
| H  | -1.169013 | -0.548109 | 2.562620  |
| H  | -1.182000 | 2.317409  | 1.536890  |
| H  | -1.182000 | 2.317409  | -1.536890 |
| H  | -1.169013 | -0.548109 | -2.562620 |
| H  | 1.504762  | 2.703206  | 0.000000  |
| H  | 1.513659  | 0.990544  | -2.390063 |
| H  | 1.587959  | -1.806968 | -1.526399 |
| H  | 1.587959  | -1.806968 | 1.526399  |
| H  | 1.513659  | 0.990544  | 2.390063  |

|   |           |           |          |
|---|-----------|-----------|----------|
| H | -1.398385 | -2.919885 | 0.000000 |
|---|-----------|-----------|----------|

|   |           |           |           |
|---|-----------|-----------|-----------|
| H | -2.101572 | 1.892096  | -1.488622 |
| H | -2.101572 | 1.892096  | 1.488622  |
| H | -1.023244 | -0.625492 | 2.454653  |
| H | -0.460962 | -2.978049 | 0.000000  |
| H | -1.023244 | -0.625492 | -2.454653 |
| H | 2.129515  | -0.738898 | 1.630478  |

1,12-SiCB<sub>10</sub>H<sub>12</sub>

|    |           |           |           |
|----|-----------|-----------|-----------|
| Si | 0.000000  | 0.000000  | 1.767860  |
| B  | 0.000000  | 1.612070  | 0.514132  |
| B  | -1.533170 | 0.498157  | 0.514132  |
| B  | -0.947551 | -1.304192 | 0.514132  |
| B  | 0.947551  | -1.304192 | 0.514132  |
| B  | 1.533170  | 0.498157  | 0.514132  |
| B  | 0.000000  | -1.530379 | -0.976304 |
| B  | 1.455477  | -0.472913 | -0.976304 |
| B  | 0.899534  | 1.238103  | -0.976304 |
| B  | -0.899534 | 1.238103  | -0.976304 |
| B  | -1.455477 | -0.472913 | -0.976304 |
| C  | 0.000000  | 0.000000  | -1.738655 |
| H  | 0.000000  | 0.000000  | -2.824117 |
| H  | 0.000000  | 0.000000  | 3.233633  |
| H  | -2.562643 | 0.832653  | 1.001466  |
| H  | -1.583800 | -2.179914 | 1.001466  |
| H  | 1.583800  | -2.179914 | 1.001466  |
| H  | 2.562643  | 0.832653  | 1.001466  |
| H  | 0.000000  | -2.513575 | -1.636134 |
| H  | 2.390552  | -0.776737 | -1.636134 |
| H  | 1.477442  | 2.033525  | -1.636134 |
| H  | -1.477442 | 2.033525  | -1.636134 |
| H  | -2.390552 | -0.776737 | -1.636134 |
| H  | 0.000000  | 2.694522  | 1.001466  |

1,7-GeCB<sub>10</sub>H<sub>12</sub>

|    |           |           |           |
|----|-----------|-----------|-----------|
| B  | 1.623467  | 0.165731  | 0.000000  |
| Ge | 0.003112  | 1.521583  | 0.000000  |
| B  | 0.494628  | 0.157974  | 1.548715  |
| B  | 1.259912  | -1.330695 | 0.907318  |
| B  | 1.259912  | -1.330695 | -0.907318 |
| B  | 0.494628  | 0.157974  | -1.548715 |
| B  | 0.033179  | -2.261439 | 0.000000  |
| B  | -0.447780 | -1.344122 | -1.458452 |
| B  | -1.294799 | 0.134742  | -0.953286 |
| B  | -1.294799 | 0.134742  | 0.953286  |
| B  | -0.447780 | -1.344122 | 1.458452  |
| C  | -1.363087 | -1.263946 | 0.000000  |
| H  | -2.321336 | -1.775290 | 0.000000  |
| H  | 2.700271  | 0.667280  | 0.000000  |
| H  | 0.796882  | 0.644706  | 2.588932  |
| H  | 2.106591  | -1.875777 | 1.533688  |
| H  | 2.106591  | -1.875777 | -1.533688 |
| H  | 0.796882  | 0.644706  | -2.588932 |
| H  | -0.105168 | -3.437305 | 0.000000  |
| H  | -0.893593 | -1.928353 | -2.387276 |
| H  | -2.257894 | 0.508195  | -1.535717 |
| H  | -2.257894 | 0.508195  | 1.535717  |
| H  | -0.893593 | -1.928353 | 2.387276  |
| H  | -0.101659 | 3.040346  | 0.000000  |

1,2-GeCB<sub>10</sub>H<sub>12</sub>

|    |           |           |           |
|----|-----------|-----------|-----------|
| B  | 1.575278  | 1.270257  | 0.000000  |
| B  | 1.294669  | -0.202802 | 0.977679  |
| B  | 1.294669  | -0.202802 | -0.977679 |
| B  | 0.511386  | 1.329150  | -1.467978 |
| B  | 0.099561  | 2.287180  | 0.000000  |
| B  | 0.511386  | 1.329150  | 1.467978  |
| B  | -1.188111 | 1.424743  | -0.896392 |
| B  | -1.188111 | 1.424743  | 0.896392  |
| B  | -0.521171 | -0.116938 | 1.505982  |
| Ge | -0.005198 | -1.523046 | 0.000000  |
| B  | -0.521171 | -0.116938 | -1.505982 |
| C  | -1.459493 | 0.002507  | 0.000000  |
| H  | -2.479444 | -0.375257 | 0.000000  |
| H  | 2.664072  | 1.742134  | 0.000000  |
| H  | 2.129515  | -0.738898 | -1.630478 |
| H  | 0.848174  | 1.838904  | -2.484570 |
| H  | 0.151950  | 3.471679  | 0.000000  |
| H  | 0.848174  | 1.838904  | 2.484570  |

1,12-GeCB<sub>10</sub>H<sub>12</sub>

|    |           |           |           |
|----|-----------|-----------|-----------|
| Ge | 0.000000  | 0.000000  | 1.516188  |
| B  | 0.000000  | 1.630577  | 0.159291  |
| B  | -1.550771 | 0.503876  | 0.159291  |
| B  | -0.958429 | -1.319164 | 0.159291  |
| B  | 0.958429  | -1.319164 | 0.159291  |
| B  | 1.550771  | 0.503876  | 0.159291  |
| B  | 0.000000  | -1.530985 | -1.322730 |
| B  | 1.456053  | -0.473100 | -1.322730 |
| B  | 0.899890  | 1.238593  | -1.322730 |
| B  | -0.899890 | 1.238593  | -1.322730 |
| B  | -1.456053 | -0.473100 | -1.322730 |
| C  | 0.000000  | 0.000000  | -2.083634 |
| H  | 0.000000  | 0.000000  | -3.168977 |
| H  | 0.000000  | 0.000000  | 3.039515  |

|   |           |           |           |
|---|-----------|-----------|-----------|
| H | -2.587903 | 0.840861  | 0.627784  |
| H | -1.599412 | -2.201402 | 0.627784  |
| H | 1.599412  | -2.201402 | 0.627784  |
| H | 2.587903  | 0.840861  | 0.627784  |
| H | 0.000000  | -2.510862 | -1.987939 |
| H | 2.387972  | -0.775899 | -1.987939 |
| H | 1.475848  | 2.031330  | -1.987939 |
| H | -1.475848 | 2.031330  | -1.987939 |
| H | -2.387972 | -0.775899 | -1.987939 |
| H | 0.000000  | 2.721082  | 0.627784  |

|   |           |           |           |
|---|-----------|-----------|-----------|
| H | 0.833057  | -3.024007 | 0.000000  |
| H | -2.159297 | 1.703691  | 0.000000  |
| H | 1.797064  | 2.526436  | 0.000000  |
| H | -0.537409 | 0.652693  | -2.624658 |
| H | -2.957433 | -0.740789 | -1.532313 |
| H | -2.957433 | -0.740789 | 1.532313  |
| H | -0.455698 | -2.393015 | -2.384877 |
| H | -1.925656 | -3.235554 | 0.000000  |
| H | -0.455698 | -2.393015 | 2.384877  |
| H | 1.999845  | -1.110471 | 1.552933  |
| H | 1.999845  | -1.110471 | -1.552933 |
| H | -0.537409 | 0.652693  | 2.624658  |

1,2-SnCB<sub>10</sub>H<sub>12</sub>

|    |           |           |           |
|----|-----------|-----------|-----------|
| B  | -2.063260 | -0.865937 | 0.000000  |
| B  | -1.246048 | 0.368748  | 0.998002  |
| B  | -1.246048 | 0.368748  | -0.998002 |
| B  | -1.098977 | -1.345203 | -1.471024 |
| B  | -1.106606 | -2.380805 | 0.000000  |
| B  | -1.098977 | -1.345203 | 1.471024  |
| B  | 0.418366  | -2.102723 | -0.893840 |
| B  | 0.418366  | -2.102723 | 0.893840  |
| B  | 0.418366  | -0.419486 | 1.492699  |
| Sn | 0.541492  | 1.331692  | 0.000000  |
| B  | 0.418366  | -0.419486 | -1.492699 |
| C  | 1.220128  | -0.894643 | 0.000000  |
| H  | 2.305800  | -0.973081 | 0.000000  |
| H  | -3.250432 | -0.875946 | 0.000000  |
| H  | -1.844923 | 1.148673  | -1.665719 |
| H  | -1.612662 | -1.681909 | -2.486205 |
| H  | -1.631436 | -3.444627 | 0.000000  |
| H  | -1.612662 | -1.681909 | 2.486205  |
| H  | 1.069986  | -2.893659 | -1.489126 |
| H  | 1.069986  | -2.893659 | 1.489126  |
| H  | 1.073349  | -0.184372 | 2.457624  |
| H  | 1.741451  | 2.519810  | 0.000000  |
| H  | 1.073349  | -0.184372 | -2.457624 |
| H  | -1.844923 | 1.148673  | 1.665719  |

1,12-SnCB<sub>10</sub>H<sub>12</sub>

|    |           |           |           |
|----|-----------|-----------|-----------|
| Sn | 0.000000  | 0.000000  | 1.415275  |
| B  | 0.000000  | 1.648636  | -0.174715 |
| B  | -1.567946 | 0.509457  | -0.174715 |
| B  | -0.969044 | -1.333775 | -0.174715 |
| B  | 0.969044  | -1.333775 | -0.174715 |
| B  | 1.567946  | 0.509457  | -0.174715 |
| B  | 0.000000  | -1.531065 | -1.648456 |
| B  | 1.456129  | -0.473125 | -1.648456 |
| B  | 0.899937  | 1.238658  | -1.648456 |
| B  | -0.899937 | 1.238658  | -1.648456 |
| B  | -1.456129 | -0.473125 | -1.648456 |
| C  | 0.000000  | 0.000000  | -2.406493 |
| H  | 0.000000  | 0.000000  | -3.492039 |
| H  | 0.000000  | 0.000000  | 3.098387  |
| H  | -2.623761 | 0.852512  | 0.248774  |
| H  | -1.621574 | -2.231905 | 0.248774  |
| H  | 1.621574  | -2.231905 | 0.248774  |
| H  | 2.623761  | 0.852512  | 0.248774  |
| H  | 0.000000  | -2.507901 | -2.319142 |
| H  | 2.385156  | -0.774984 | -2.319142 |
| H  | 1.474107  | 2.028934  | -2.319142 |
| H  | -1.474107 | 2.028934  | -2.319142 |
| H  | -2.385156 | -0.774984 | -2.319142 |
| H  | 0.000000  | 2.758786  | 0.248774  |

1,7-SnCB<sub>10</sub>H<sub>12</sub>

|    |           |           |           |
|----|-----------|-----------|-----------|
| B  | -1.475306 | 0.731119  | 0.000000  |
| B  | -0.513117 | 0.113845  | 1.565244  |
| Sn | 0.754324  | 1.205323  | 0.000000  |
| B  | -0.513117 | 0.113845  | -1.565244 |
| B  | -1.948378 | -0.728871 | -0.908498 |
| B  | -1.948378 | -0.728871 | 0.908498  |
| B  | -0.513117 | -1.655617 | -1.459345 |
| B  | -1.409213 | -2.169823 | 0.000000  |
| B  | -0.513117 | -1.655617 | 1.459345  |
| B  | 0.998948  | -0.869886 | 0.961289  |
| B  | 0.998948  | -0.869886 | -0.961289 |
| C  | 0.303208  | -2.075793 | 0.000000  |

1,2-PbCB<sub>10</sub>H<sub>12</sub>

|   |           |           |           |
|---|-----------|-----------|-----------|
| B | -2.132790 | -1.212147 | 0.000000  |
| B | -1.337543 | -0.007302 | 1.042357  |
| B | -1.337543 | -0.007302 | -1.042357 |
| B | -1.163440 | -1.722798 | -1.476049 |
| B | -1.190314 | -2.741740 | 0.000000  |
| B | -1.163440 | -1.722798 | 1.476049  |
| B | 0.342313  | -2.471116 | -0.889981 |
| B | 0.342313  | -2.471116 | 0.889981  |

|    |           |           |           |
|----|-----------|-----------|-----------|
| B  | 0.342313  | -0.782036 | 1.476634  |
| Pb | 0.395813  | 1.114441  | 0.000000  |
| B  | 0.342313  | -0.782036 | -1.476634 |
| C  | 1.115187  | -1.239306 | 0.000000  |
| H  | 2.202603  | -1.292012 | 0.000000  |
| H  | -3.320917 | -1.218148 | 0.000000  |
| H  | -1.952465 | 0.771521  | -1.694447 |
| H  | -1.696199 | -2.046345 | -2.486181 |
| H  | -1.741248 | -3.792608 | 0.000000  |
| H  | -1.696199 | -2.046345 | 2.486181  |
| H  | 0.996169  | -3.260425 | -1.485401 |
| H  | 0.996169  | -3.260425 | 1.485401  |
| H  | 0.996779  | -0.536522 | 2.439278  |
| H  | 1.802282  | 2.099918  | 0.000000  |
| H  | 0.996779  | -0.536522 | -2.439278 |
| H  | -1.952465 | 0.771521  | 1.694447  |

|   |           |           |           |
|---|-----------|-----------|-----------|
| B | 1.575646  | 0.511958  | -0.509182 |
| B | 0.000000  | 1.656732  | -0.509182 |
| B | -1.575646 | 0.511959  | -0.509182 |
| B | -0.973803 | -1.340324 | -0.509182 |
| B | 0.973802  | -1.340325 | -0.509182 |
| B | -1.455822 | -0.473025 | -1.976955 |
| B | 0.000000  | -1.530742 | -1.976955 |
| B | 1.455822  | -0.473025 | -1.976955 |
| B | 0.899748  | 1.238396  | -1.976955 |
| B | -0.899747 | 1.238396  | -1.976955 |
| C | 0.000000  | 0.000000  | -2.735847 |
| H | 0.000000  | 0.000000  | -3.821494 |
| H | 0.000000  | 0.000000  | 2.836272  |
| H | 0.000000  | 2.766663  | -0.087407 |
| H | -2.631253 | 0.854946  | -0.087407 |
| H | -1.626204 | -2.238277 | -0.087407 |
| H | 1.626204  | -2.238277 | -0.087407 |
| H | -2.385102 | -0.774967 | -2.647653 |
| H | 0.000000  | -2.507845 | -2.647653 |
| H | 2.385102  | -0.774966 | -2.647653 |
| H | 1.474074  | 2.028889  | -2.647653 |
| H | -1.474074 | 2.028889  | -2.647653 |
| H | 2.631253  | 0.854946  | -0.087407 |

1,7-PbCB<sub>10</sub>H<sub>12</sub>

|    |           |           |           |
|----|-----------|-----------|-----------|
| B  | 1.646981  | -0.473907 | 0.000000  |
| Pb | 0.003075  | 1.148057  | 0.000000  |
| B  | 0.461457  | -0.510709 | 1.584267  |
| B  | 1.270191  | -1.953302 | 0.914880  |
| B  | 1.270191  | -1.953302 | -0.914880 |
| B  | 0.461457  | -0.510709 | -1.584267 |
| B  | 0.082187  | -2.922468 | 0.000000  |
| B  | -0.440041 | -2.027552 | -1.455204 |
| B  | -1.320715 | -0.571367 | -0.951278 |
| B  | -1.320715 | -0.571367 | 0.951278  |
| B  | -0.440041 | -2.027552 | 1.455204  |
| C  | -1.347495 | -1.971685 | 0.000000  |
| H  | -2.289212 | -2.513041 | 0.000000  |
| H  | 2.735046  | 0.001298  | 0.000000  |
| H  | 0.763926  | -0.064481 | 2.642755  |
| H  | 2.138098  | -2.477324 | 1.531680  |
| H  | 2.138098  | -2.477324 | -1.531680 |
| H  | 0.763926  | -0.064481 | -2.642755 |
| H  | -0.004145 | -4.103706 | 0.000000  |
| H  | -0.859398 | -2.633741 | -2.382884 |
| H  | -2.303538 | -0.259326 | -1.540211 |
| H  | -2.303538 | -0.259326 | 1.540211  |
| H  | -0.859398 | -2.633741 | 2.382884  |
| H  | -0.441806 | 2.785770  | 0.000000  |

1,2-NCB<sub>10</sub>H<sub>11</sub>

|   |           |           |           |
|---|-----------|-----------|-----------|
| B | 0.001277  | 1.337328  | 1.090055  |
| B | 0.888366  | 1.370633  | -0.463541 |
| B | -0.885748 | 1.372327  | -0.463540 |
| B | -1.465250 | 0.304675  | 0.843828  |
| B | -0.000335 | -0.352367 | 1.682338  |
| B | 1.465830  | 0.301878  | 0.843826  |
| B | -0.900437 | -1.359449 | 0.502296  |
| B | 0.897841  | -1.361166 | 0.502296  |
| B | 1.427006  | -0.283771 | -0.849842 |
| N | 0.000344  | 0.360643  | -1.484456 |
| B | -1.427547 | -0.281046 | -0.849841 |
| C | -0.001149 | -1.202336 | -0.913852 |
| H | -0.001832 | -1.917146 | -1.730984 |
| H | 0.002180  | 2.282686  | 1.804943  |
| H | -1.463681 | 2.237734  | -1.024348 |
| H | -2.503048 | 0.504930  | 1.379629  |
| H | -0.000600 | -0.629999 | 2.834822  |
| H | 2.504009  | 0.500148  | 1.379626  |
| H | -1.512194 | -2.361998 | 0.652571  |
| H | 1.507682  | -2.364881 | 0.652569  |
| H | 2.290019  | -0.523238 | -1.619778 |
| H | -2.291015 | -0.518864 | -1.619775 |
| H | 1.467951  | 2.234935  | -1.024350 |

1,12-PbCB<sub>10</sub>H<sub>12</sub>

|    |          |          |          |
|----|----------|----------|----------|
| Pb | 0.000000 | 0.000000 | 1.136939 |
|----|----------|----------|----------|

1,7-NCB<sub>10</sub>H<sub>11</sub>

|   |           |           |           |
|---|-----------|-----------|-----------|
| B | 1.459148  | 0.859836  | 0.000000  |
| N | -0.114274 | 1.510744  | 0.000000  |
| B | 0.427543  | 0.795509  | 1.441984  |
| B | 1.301206  | -0.675222 | 0.903835  |
| B | 1.301206  | -0.675222 | -0.903835 |
| B | 0.427543  | 0.795509  | -1.441984 |
| B | 0.132357  | -1.687844 | 0.000000  |
| B | -0.404818 | -0.785010 | -1.454635 |
| B | -1.234050 | 0.682518  | -0.887796 |
| B | -1.234050 | 0.682518  | 0.887796  |
| B | -0.404818 | -0.785010 | 1.454635  |
| C | -1.318751 | -0.769956 | 0.000000  |
| H | -2.266494 | -1.300911 | 0.000000  |
| H | 2.346298  | 1.640871  | 0.000000  |
| H | 0.650955  | 1.517666  | 2.350385  |
| H | 2.190946  | -1.128318 | 1.541578  |
| H | 2.190946  | -1.128318 | -1.541578 |
| H | 0.650955  | 1.517666  | -2.350385 |
| H | 0.065047  | -2.869886 | 0.000000  |
| H | -0.829044 | -1.346266 | -2.406193 |
| H | -2.157236 | 1.225188  | -1.385380 |
| H | -2.157236 | 1.225188  | 1.385380  |
| H | -0.829044 | -1.346266 | 2.406193  |

1,2-PCB<sub>10</sub>H<sub>11</sub>

|   |           |           |           |
|---|-----------|-----------|-----------|
| B | -1.819604 | -0.224143 | 0.000000  |
| B | -0.930547 | 1.022368  | 0.928876  |
| B | -0.930547 | 1.022368  | -0.928876 |
| B | -0.864139 | -0.686299 | -1.463645 |
| B | -0.869599 | -1.741201 | 0.000000  |
| B | -0.864139 | -0.686299 | 1.463645  |
| B | 0.657315  | -1.450700 | -0.896378 |
| B | 0.657315  | -1.450700 | 0.896378  |
| B | 0.657315  | 0.239296  | 1.483249  |
| P | 0.772670  | 1.662900  | 0.000000  |
| B | 0.657315  | 0.239296  | -1.483249 |
| C | 1.462135  | -0.250581 | 0.000000  |
| H | 2.549138  | -0.262760 | 0.000000  |
| H | -3.005347 | -0.212846 | 0.000000  |
| H | -1.417939 | 1.895081  | -1.568211 |
| H | -1.364465 | -1.000933 | -2.491326 |
| H | -1.374204 | -2.814045 | 0.000000  |
| H | -1.364465 | -1.000933 | 2.491326  |
| H | 1.325182  | -2.224123 | -1.495068 |
| H | 1.325182  | -2.224123 | 1.495068  |
| H | 1.314278  | 0.544822  | 2.420829  |
| H | 1.314278  | 0.544822  | -2.420829 |
| H | -1.417939 | 1.895081  | 1.568211  |

1,12-NCB<sub>10</sub>H<sub>11</sub>

|   |           |           |           |
|---|-----------|-----------|-----------|
| N | 0.000000  | 0.000000  | 1.505786  |
| B | 0.000000  | -1.509640 | 0.770043  |
| B | 1.435753  | -0.466504 | 0.770043  |
| B | 0.887344  | 1.221324  | 0.770043  |
| B | -0.887344 | 1.221324  | 0.770043  |
| B | -1.435753 | -0.466504 | 0.770043  |
| B | 0.000000  | 1.530327  | -0.742319 |
| B | -1.455427 | 0.472897  | -0.742319 |
| B | -0.899504 | -1.238060 | -0.742319 |
| B | 0.899504  | -1.238060 | -0.742319 |
| B | 1.455427  | 0.472897  | -0.742319 |
| C | 0.000000  | 0.000000  | -1.511579 |
| H | 0.000000  | 0.000000  | -2.597516 |
| H | 2.348837  | -0.763183 | 1.457938  |
| H | 1.451661  | 1.998040  | 1.457938  |
| H | -1.451661 | 1.998040  | 1.457938  |
| H | -2.348837 | -0.763184 | 1.457938  |
| H | 0.000000  | 2.532218  | -1.371257 |
| H | -2.408282 | 0.782498  | -1.371257 |
| H | -1.488400 | -2.048607 | -1.371257 |
| H | 1.488400  | -2.048607 | -1.371257 |
| H | 2.408282  | 0.782498  | -1.371257 |
| H | 0.000000  | -2.469713 | 1.457938  |

1,7-PCB<sub>10</sub>H<sub>11</sub>

|   |           |           |           |
|---|-----------|-----------|-----------|
| B | -1.643801 | 0.253470  | 0.000000  |
| P | -0.832413 | -1.645629 | 0.000000  |
| B | -0.672391 | -0.238409 | -1.507084 |
| B | -0.672391 | 1.451348  | 0.904655  |
| B | -0.672391 | 1.451348  | -0.904655 |
| B | -0.672391 | -0.238409 | -1.507084 |
| B | 0.845211  | 1.725952  | 0.000000  |
| B | 0.852238  | 0.680417  | -1.455392 |
| B | 0.891698  | -1.016788 | -0.932345 |
| B | 0.891698  | -1.016788 | 0.932345  |
| B | 0.852238  | 0.680417  | 1.455392  |
| C | 1.625680  | 0.194853  | 0.000000  |
| H | 2.712438  | 0.190752  | 0.000000  |
| H | -2.829526 | 0.229398  | 0.000000  |
| H | -1.184771 | -0.585426 | 2.518302  |
| H | -1.192887 | 2.307168  | 1.538281  |
| H | -1.192887 | 2.307168  | -1.538281 |
| H | -1.184771 | -0.585426 | -2.518302 |
| H | 1.508260  | 2.706868  | 0.000000  |
| H | 1.509994  | 0.974069  | -2.394876 |
| H | 1.538839  | -1.833060 | -1.495167 |
| H | 1.538839  | -1.833060 | 1.495167  |
| H | 1.509994  | 0.974069  | 2.394876  |



1,12-PCB<sub>10</sub>H<sub>11</sub>

|   |           |           |           |
|---|-----------|-----------|-----------|
| P | 0.000000  | 0.000000  | 1.842489  |
| B | 0.000000  | 1.585127  | 0.517748  |
| B | -1.507545 | 0.489831  | 0.517748  |
| B | -0.931714 | -1.282395 | 0.517748  |
| B | 0.931714  | -1.282395 | 0.517748  |
| B | 1.507545  | 0.489831  | 0.517748  |
| B | 0.000000  | -1.528363 | -0.975884 |
| B | 1.453560  | -0.472290 | -0.975884 |
| B | 0.898349  | 1.236472  | -0.975884 |
| B | -0.898349 | 1.236472  | -0.975884 |
| B | -1.453560 | -0.472290 | -0.975884 |
| C | 0.000000  | 0.000000  | -1.742074 |
| H | 0.000000  | 0.000000  | -2.827873 |
| H | -2.518108 | 0.818183  | 1.042125  |
| H | -1.556276 | -2.142031 | 1.042125  |
| H | 1.556276  | -2.142031 | 1.042125  |
| H | 2.518108  | 0.818183  | 1.042125  |
| H | 0.000000  | -2.519582 | -1.622846 |
| H | 2.396265  | -0.778594 | -1.622846 |
| H | 1.480973  | 2.038385  | -1.622846 |
| H | -1.480973 | 2.038385  | -1.622846 |
| H | -2.396265 | -0.778594 | -1.622846 |
| H | 0.000000  | 2.647695  | 1.042125  |

1,7-AsCB<sub>10</sub>H<sub>11</sub>

|    |           |           |           |
|----|-----------|-----------|-----------|
| B  | 1.596701  | 0.138665  | 0.000000  |
| As | 0.000874  | 1.601248  | 0.000000  |
| B  | 0.495164  | 0.140171  | 1.520111  |
| B  | 1.254860  | -1.362067 | 0.904887  |
| B  | 1.254860  | -1.362067 | -0.904887 |
| B  | 0.495164  | 0.140171  | -1.520111 |
| B  | 0.024339  | -2.291324 | 0.000000  |
| B  | -0.452952 | -1.362234 | -1.456690 |
| B  | -1.266860 | 0.127264  | -0.940639 |
| B  | -1.266860 | 0.127264  | 0.940639  |
| B  | -0.452952 | -1.362234 | 1.456690  |
| C  | -1.364527 | -1.277711 | 0.000000  |
| H  | -2.334101 | -1.768824 | 0.000000  |
| H  | 2.659298  | 0.667126  | 0.000000  |
| H  | 0.798795  | 0.652269  | 2.546254  |
| H  | 2.102670  | -1.898019 | 1.536955  |
| H  | 2.102670  | -1.898019 | -1.536955 |
| H  | 0.798795  | 0.652269  | -2.546254 |
| H  | -0.124612 | -3.465949 | 0.000000  |
| H  | -0.905563 | -1.928358 | -2.393070 |
| H  | -2.220697 | 0.536455  | -1.511953 |
| H  | -2.220697 | 0.536455  | 1.511953  |
| H  | -0.905563 | -1.928358 | 2.393070  |

1,2-AsCB<sub>10</sub>H<sub>11</sub>

|    |           |           |           |
|----|-----------|-----------|-----------|
| B  | 1.575287  | 1.312273  | 0.000000  |
| B  | 1.282121  | -0.181343 | 0.937948  |
| B  | 1.282121  | -0.181343 | -0.937948 |
| B  | 0.513857  | 1.347230  | -1.463455 |
| B  | 0.093981  | 2.314432  | 0.000000  |
| B  | 0.513857  | 1.347230  | 1.463455  |
| B  | -1.188230 | 1.433169  | -0.896114 |
| B  | -1.188230 | 1.433169  | 0.896114  |
| B  | -0.505386 | -0.111225 | 1.485927  |
| As | -0.021264 | -1.596605 | 0.000000  |
| B  | -0.505386 | -0.111225 | -1.485927 |
| C  | -1.447720 | 0.015866  | 0.000000  |
| H  | -2.456505 | -0.389235 | 0.000000  |
| H  | 2.661781  | 1.788229  | 0.000000  |
| H  | 2.097075  | -0.747858 | -1.589800 |
| H  | 0.843914  | 1.842133  | -2.489246 |
| H  | 0.123897  | 3.499754  | 0.000000  |
| H  | 0.843914  | 1.842133  | 2.489246  |
| H  | -2.107080 | 1.875218  | -1.499128 |
| H  | -2.107080 | 1.875218  | 1.499128  |
| H  | -0.989466 | -0.628398 | 2.437003  |
| H  | -0.989466 | -0.628398 | -2.437003 |
| H  | 2.097075  | -0.747858 | 1.589800  |

1,12-AsCB<sub>10</sub>H<sub>11</sub>

|    |           |           |           |
|----|-----------|-----------|-----------|
| As | 0.000000  | 0.000000  | 1.597831  |
| B  | 0.000000  | 1.600721  | 0.142140  |
| B  | -1.522376 | 0.494650  | 0.142140  |
| B  | -0.940880 | -1.295011 | 0.142140  |
| B  | 0.940880  | -1.295011 | 0.142140  |
| B  | 1.522376  | 0.494650  | 0.142140  |
| B  | 0.000000  | -1.528635 | -1.345443 |
| B  | 1.453818  | -0.472374 | -1.345443 |
| B  | 0.898509  | 1.236692  | -1.345443 |
| B  | -0.898509 | 1.236692  | -1.345443 |
| B  | -1.453818 | -0.472374 | -1.345443 |
| C  | 0.000000  | 0.000000  | -2.109210 |
| H  | 0.000000  | 0.000000  | -3.194999 |
| H  | -2.545884 | 0.827208  | 0.639666  |
| H  | -1.573443 | -2.165658 | 0.639666  |
| H  | 1.573443  | -2.165658 | 0.639666  |
| H  | 2.545884  | 0.827208  | 0.639666  |
| H  | 0.000000  | -2.516028 | -1.998785 |
| H  | 2.392885  | -0.777495 | -1.998785 |
| H  | 1.478884  | 2.035509  | -1.998785 |
| H  | -1.478884 | 2.035509  | -1.998785 |
| H  | -2.392885 | -0.777495 | -1.998785 |
| H  | 0.000000  | 2.676901  | 0.639666  |

1,2-SbCB<sub>10</sub>H<sub>11</sub>

|    |           |           |           |
|----|-----------|-----------|-----------|
| B  | -2.108555 | -0.885609 | 0.000000  |
| B  | -1.250495 | 0.363621  | 0.946771  |
| B  | -1.250495 | 0.363621  | -0.946771 |
| B  | -1.144141 | -1.343843 | -1.464879 |
| B  | -1.152353 | -2.394800 | 0.000000  |
| B  | -1.144141 | -1.343843 | 1.464879  |
| B  | 0.378142  | -2.111200 | -0.895490 |
| B  | 0.378142  | -2.111200 | 0.895490  |
| B  | 0.378142  | -0.422406 | 1.482215  |
| Sb | 0.608216  | 1.364548  | 0.000000  |
| B  | 0.378142  | -0.422406 | -1.482215 |
| C  | 1.192206  | -0.922695 | 0.000000  |
| H  | 2.277268  | -0.998536 | 0.000000  |
| H  | -3.295109 | -0.893479 | 0.000000  |
| H  | -1.812837 | 1.169814  | -1.616735 |
| H  | -1.645707 | -1.670225 | -2.489173 |
| H  | -1.656435 | -3.468587 | 0.000000  |
| H  | -1.645707 | -1.670225 | 2.489173  |
| H  | 1.032760  | -2.891618 | -1.501169 |
| H  | 1.032760  | -2.891618 | 1.501169  |
| H  | 1.020818  | -0.185387 | 2.452879  |
| H  | 1.020818  | -0.185387 | -2.452879 |
| H  | -1.812837 | 1.169814  | 1.616735  |

1,12-SbCB<sub>10</sub>H<sub>11</sub>

|    |           |           |           |
|----|-----------|-----------|-----------|
| Sb | 0.000000  | 0.000000  | 1.488772  |
| B  | 0.000000  | 1.618148  | -0.203574 |
| B  | -1.538950 | 0.500035  | -0.203574 |
| B  | -0.951124 | -1.309109 | -0.203574 |
| B  | 0.951124  | -1.309109 | -0.203574 |
| B  | 1.538950  | 0.500035  | -0.203574 |
| B  | 0.000000  | -1.529536 | -1.685232 |
| B  | 1.454675  | -0.472653 | -1.685232 |
| B  | 0.899039  | 1.237421  | -1.685232 |
| B  | -0.899039 | 1.237421  | -1.685232 |
| B  | -1.454675 | -0.472653 | -1.685232 |
| C  | 0.000000  | 0.000000  | -2.446879 |
| H  | 0.000000  | 0.000000  | -3.532892 |
| H  | -2.583679 | 0.839488  | 0.247141  |
| H  | -1.596801 | -2.197809 | 0.247141  |
| H  | 1.596801  | -2.197809 | 0.247141  |
| H  | 2.583679  | 0.839488  | 0.247141  |
| H  | 0.000000  | -2.512804 | -2.345753 |
| H  | 2.389819  | -0.776499 | -2.345753 |
| H  | 1.476989  | 2.032901  | -2.345753 |
| H  | -1.476989 | 2.032901  | -2.345753 |
| H  | -2.389819 | -0.776499 | -2.345753 |
| H  | 0.000000  | 2.716641  | 0.247141  |

1,7-SbCB<sub>10</sub>H<sub>11</sub>

|    |           |           |           |
|----|-----------|-----------|-----------|
| B  | 1.611132  | -0.206502 | 0.000000  |
| Sb | 0.000197  | 1.493639  | 0.000000  |
| B  | 0.497738  | -0.206939 | 1.534560  |
| B  | 1.256666  | -1.702245 | 0.905646  |
| B  | 1.256666  | -1.702245 | -0.905646 |
| B  | 0.497738  | -0.206939 | -1.534560 |
| B  | 0.026667  | -2.630496 | 0.000000  |
| B  | -0.451610 | -1.704945 | -1.458185 |
| B  | -1.280652 | -0.222745 | -0.950887 |
| B  | -1.280652 | -0.222745 | 0.950887  |
| B  | -0.451610 | -1.704945 | 1.458185  |
| C  | -1.364559 | -1.619433 | 0.000000  |
| H  | -2.330403 | -2.117554 | 0.000000  |
| H  | 2.697934  | 0.274859  | 0.000000  |
| H  | 0.807913  | 0.257357  | 2.583416  |
| H  | 2.102984  | -2.243818 | 1.535862  |
| H  | 2.102984  | -2.243818 | -1.535862 |
| H  | 0.807913  | 0.257357  | -2.583416 |
| H  | -0.121599 | -3.805485 | 0.000000  |
| H  | -0.902229 | -2.280663 | -2.390221 |
| H  | -2.248179 | 0.138594  | -1.534975 |
| H  | -2.248179 | 0.138594  | 1.534975  |
| H  | -0.902229 | -2.280663 | 2.390221  |

1,2-BiCB<sub>10</sub>H<sub>11</sub>

|    |           |           |           |
|----|-----------|-----------|-----------|
| B  | -2.251603 | -1.223347 | 0.000000  |
| B  | -1.398907 | 0.026842  | 0.947872  |
| B  | -1.398907 | 0.026842  | -0.947872 |
| B  | -1.284993 | -1.679762 | -1.464620 |
| B  | -1.294770 | -2.731227 | 0.000000  |
| B  | -1.284993 | -1.679762 | 1.464620  |
| B  | 0.237296  | -2.447729 | -0.894876 |
| B  | 0.237296  | -2.447729 | 0.894876  |
| B  | 0.237296  | -0.757513 | 1.476717  |
| Bi | 0.489228  | 1.110527  | 0.000000  |
| B  | 0.237296  | -0.757513 | -1.476717 |
| C  | 1.049545  | -1.260049 | 0.000000  |
| H  | 2.134326  | -1.341915 | 0.000000  |
| H  | -3.438514 | -1.233506 | 0.000000  |
| H  | -1.969176 | 0.824111  | -1.623008 |
| H  | -1.784216 | -2.006358 | -2.490362 |
| H  | -1.798591 | -3.805314 | 0.000000  |
| H  | -1.784216 | -2.006358 | 2.490362  |
| H  | 0.888383  | -3.229075 | -1.503727 |
| H  | 0.888383  | -3.229075 | 1.503727  |

|   |           |           |           |   |           |           |           |
|---|-----------|-----------|-----------|---|-----------|-----------|-----------|
| H | 0.877267  | -0.527802 | 2.451778  | H | 1.601169  | -2.203821 | -0.126220 |
| H | 0.877267  | -0.527802 | -2.451778 | H | -2.389060 | -0.776253 | -2.709603 |
| H | -1.969176 | 0.824111  | 1.623008  | H | 0.000000  | -2.512006 | -2.709603 |
|   |           |           |           | H | 2.389060  | -0.776252 | -2.709603 |
|   |           |           |           | H | 1.476520  | 2.032256  | -2.709603 |
|   |           |           |           | H | -1.476521 | 2.032256  | -2.709603 |
|   |           |           |           | H | 2.590746  | 0.841785  | -0.126220 |

1,7-BiCB<sub>10</sub>H<sub>11</sub>

|    |           |           |           |
|----|-----------|-----------|-----------|
| B  | 1.613316  | -0.570860 | 0.000000  |
| Bi | 0.000069  | 1.211829  | 0.000000  |
| B  | 0.497173  | -0.571246 | 1.536474  |
| B  | 1.257131  | -2.064215 | 0.906130  |
| B  | 1.257131  | -2.064215 | -0.906130 |
| B  | 0.497173  | -0.571246 | -1.536474 |
| B  | 0.027958  | -2.992401 | 0.000000  |
| B  | -0.451705 | -2.067834 | -1.458523 |
| B  | -1.281950 | -0.587623 | -0.952038 |
| B  | -1.281950 | -0.587623 | 0.952038  |
| B  | -0.451705 | -2.067834 | 1.458523  |
| C  | -1.364773 | -1.982433 | 0.000000  |
| H  | -2.329749 | -2.482669 | 0.000000  |
| H  | 2.704551  | -0.097689 | 0.000000  |
| H  | 0.808646  | -0.116049 | 2.589856  |
| H  | 2.103158  | -2.607679 | 1.535866  |
| H  | 2.103158  | -2.607679 | -1.535866 |
| H  | 0.808646  | -0.116049 | -2.589856 |
| H  | -0.119547 | -4.167744 | 0.000000  |
| H  | -0.901636 | -2.646745 | -2.389372 |
| H  | -2.252755 | -0.236345 | -1.538515 |
| H  | -2.252755 | -0.236345 | 1.538515  |
| H  | -0.901636 | -2.646745 | 2.389372  |

1,12-BiCB<sub>10</sub>H<sub>11</sub>

|    |           |           |           |
|----|-----------|-----------|-----------|
| Bi | 0.000000  | 0.000000  | 1.207951  |
| B  | 1.540614  | 0.500576  | -0.566857 |
| B  | 0.000000  | 1.619897  | -0.566857 |
| B  | -1.540614 | 0.500576  | -0.566857 |
| B  | -0.952152 | -1.310525 | -0.566857 |
| B  | 0.952152  | -1.310524 | -0.566857 |
| B  | -1.454943 | -0.472740 | -2.046734 |
| B  | 0.000000  | -1.529818 | -2.046734 |
| B  | 1.454943  | -0.472739 | -2.046734 |
| B  | 0.899204  | 1.237649  | -2.046734 |
| B  | -0.899205 | 1.237648  | -2.046734 |
| C  | 0.000000  | 0.000000  | -2.807840 |
| H  | 0.000000  | 0.000000  | -3.893939 |
| H  | 0.000000  | 2.724072  | -0.126220 |
| H  | -2.590746 | 0.841785  | -0.126220 |
| H  | -1.601169 | -2.203821 | -0.126220 |

Appendix VII: Distorted geometries of the optimized structures of 2,7-, 2,8- and 2,9- $[\text{Sn}_2\text{B}_9\text{H}_{11}]^{2-}$ .

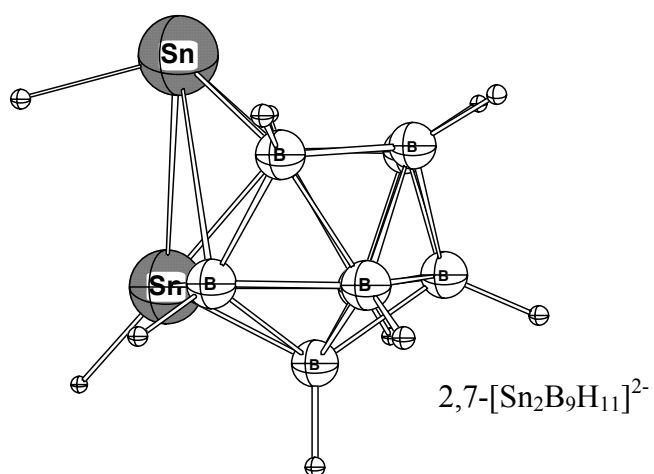

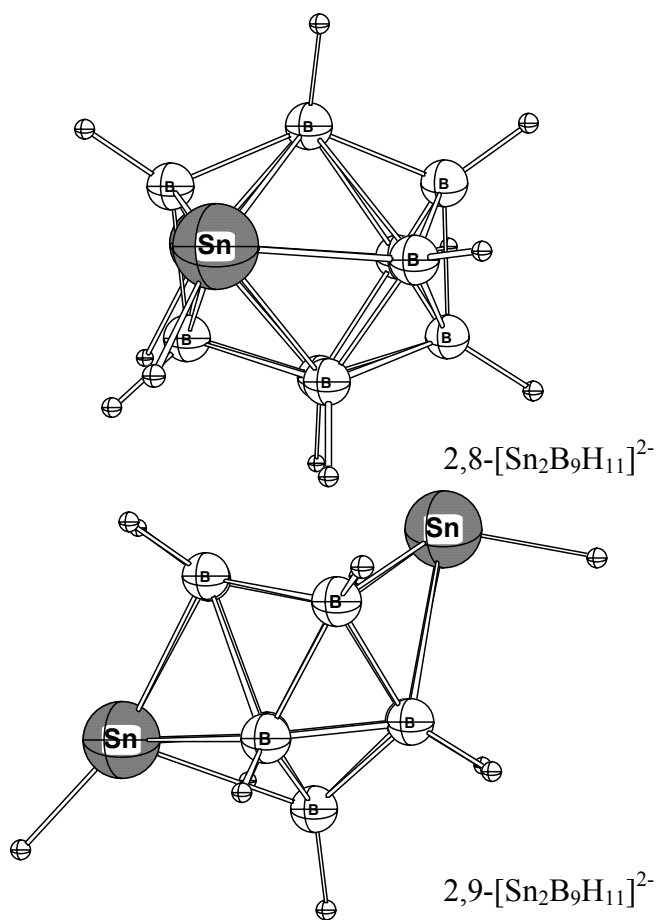

Supplement: b512700a.pdf [file b512700a.pdf]
